1 **Title:** Differential dynamics of microbial community networks help identify microorganisms  
2 interacting with residue-borne pathogens: the case of *Zymoseptoria tritici* in wheat

3

4 **Authors:** Lydie Kerdraon <sup>1\*</sup>, Matthieu Barret <sup>2</sup>, Valérie Laval <sup>1</sup>, Frédéric Suffert <sup>1\*</sup>

5

6 **Address:** <sup>1</sup> UMR BIOGER, INRA, AgroParisTech, Université Paris-Saclay, 78850 Thiverval-  
7 Grignon, France; <sup>2</sup> UMR IRHS, INRA, Agrocampus Ouest, Université d'Angers, 49071  
8 Beaucouzé, France

9 \*corresponding authors: lydiekerdraon@gmail.com; frederic.suffert@inra.fr; tel +33 (0)1 30  
10 8154 35; ORCID 0000-0001-6969-3878

11

## 12 **Abstract**

13 **Background** - Wheat residues are a crucial determinant of the epidemiology of *Septoria tritici*  
14 blotch, as they support the sexual reproduction of the causal agent *Zymoseptoria tritici*. We  
15 aimed to characterize the effect of infection with this fungal pathogen on the microbial  
16 communities present on wheat residues, and to identify microorganisms interacting with it.  
17 We used metabarcoding to compare the microbiome associated with wheat residues placed  
18 outdoors, with and without preliminary *Z. tritici* inoculation, comparing a first set of residues  
19 in contact with the soil and a second set without contact with the soil, on four sampling dates  
20 in two consecutive years.

21 **Results** - The diversity of the tested conditions, leading to the establishment of different  
22 microbial communities according to the origins of the constitutive taxa (plant only, or plant  
23 and soil), highlighted the effect of *Z. tritici* on the wheat residue microbiome. Several  
24 microorganisms were affected by *Z. tritici* infection, even after the disappearance of the  
25 pathogen. Linear discriminant analyses and ecological network analyses were combined to

26 describe the communities affected by infection. The number of fungi and bacteria promoted  
27 or inhibited by inoculation with *Z. tritici* decreased over time, and was smaller for residues in  
28 contact with the soil. The interactions between the pathogen and other microorganisms  
29 appeared to be mostly indirect, despite the strong position of the pathogen as a keystone taxon  
30 in networks. Direct interactions with other members of the communities mostly involved  
31 fungi, including other wheat pathogens.

32 **Conclusions** - Our results provide essential information about the alterations to the microbial  
33 community in wheat residues induced by the mere presence of a fungal pathogen, and vice  
34 versa. Species already described as beneficial or biocontrol agents were found to be affected  
35 by pathogen inoculation. The strategy developed here can be viewed as a proof-of-concept for  
36 crop residues serving as a particularly rich ecological compartment, with a high diversity of  
37 taxa originating from both the plant and soil compartments, and for *Z. tritici*-wheat as a model  
38 pathosystem. By revealing putative antagonistic interactions, we demonstrate that this strategy  
39 can be used to improve the biological control of residue-borne diseases.

40

#### 41 **Keywords**

42 Ecological interaction networks, metabarcoding, microbial communities, microbiome,  
43 pathobiome, *Septoria tritici* blotch, wheat residues.

## 44 **Background**

45

46       Septoria tritici blotch (STB) is one of the most important disease of wheat (*Triticum*  
47 *aestivum*), causing yield losses averaging 20% on susceptible wheat varieties and 5–10% on  
48 wheat varieties selected for disease resistance and sprayed with fungicide in Northwestern  
49 Europe [1]. It is caused by the hemibiotrophic, heterothallic, ascomycete fungus *Zymoseptoria*  
50 *tritici* [2], which initiates its sexual reproduction on senescent tissues [3]. STB is clonally  
51 propagated between wheat plants during the cropping season by pycnidiospores (asexual  
52 spores), which are splash-dispersed upwards over short distances. Wind-dispersed ascospores  
53 (sexual spores), mostly produced on wheat residues, initiate subsequent epidemics. Thus,  
54 wheat residues are a crucial, but often neglected determinant of the epidemiology of STB  
55 during the interepidemic period, as they support the sexual reproduction of the pathogen,  
56 maintaining diversity within populations and influencing adaptive dynamics in response to  
57 selection pressures [4], through the rapid evolution of fungicide resistance [5–8] or the  
58 breakdown of wheat resistance genes [9], for example.

59       The identification of microorganisms interacting with pathogens is an increasingly  
60 important issue for both academic and operational research on the development of biological  
61 control solutions [10,11]. In plant, animal and human epidemiology, increasing numbers of  
62 studies are trying to characterize variant microbial populations associated with specific  
63 disease stages, or temporal changes in the microbial populations during disease progression  
64 [12–14]. The pathogen and its cohort of associated microorganisms, which may influence its  
65 persistence, transmission and evolution, are together known as the “pathobiome” [15].  
66 Pathobiome research has advanced significantly with the advent of high-throughput  
67 sequencing technologies, which have made it possible to describe and follow the diversity of

68 the microbial communities associated with the pathogen during its life cycle, during both the  
69 epidemic and interepidemic periods.

70 The dynamics of microbial communities have been studied in detail during the  
71 vegetative and reproductive stages of the plant life cycle, but very few studies during and after  
72 plant senescence (e.g. [16,17]). The specific, central position of crop residues in agrosystems  
73 was long neglected, but these residues should be seen as both a fully-fledged matrix and a  
74 transient compartment: a compartment originating from the plant (temporal link), but in close  
75 contact with the soil (spatial link), with variable rates of degradation over the following  
76 cropping season, according to the plant species, the cropping practices used, and the climatic  
77 conditions in the year concerned [16,19–21]. In addition, the rare studies focusing on the  
78 evolution of microbial communities in crop residues performed to date were conducted in  
79 microcosms, with sterilized residues (e.g. [22]), in which this compartment is much less  
80 complex than under natural conditions.

81 Several studies have investigated the potential beneficial effects of microorganisms for  
82 limiting the development of a plant pathogen during its saprophytic stage on natural crop  
83 residues (e.g. *Aureobasidium pullulans* and *Clonostachys rosea* inhibiting the sexual stage of  
84 *Didymella rabiei* on chickpea residues [23]; *Trichoderma harzianum* [24,25],  
85 *Microsphaeropsis* sp. [26], *C. rosea* [27,28] and *Streptomyces* sp. [29] reducing *Fusarium*  
86 *graminearum* inoculum (perithecia, the sexual fruiting bodies) on wheat or maize residues, as  
87 exhaustively summarized in [30]). Other studies have focused on the general impact of  
88 cropping practices, such as the increase in microbial soil antagonists induced by the addition  
89 of green manure to the soil (e.g. [19,31]). Some phyllosphere microorganisms selected for  
90 their antifungal activity against *Z. tritici* (*Bacillus megaterium* [32]; *Pseudomonas fluorescens*  
91 [33]; *Cryptococcus* sp., *Rhodotorula rubra* and *Penicillium lilacinum* [34]; *T. harzianum* [35];  
92 *Trichoderma koningii* [36]) have been tested *in planta* against the asexual, pathogenic stage of

93 the pathogen (typically on wheat seedlings), but not against the pathogen during its sexual,  
94 saprophytic stage. Moreover, no microbial antagonists of *Z. tritici* have been isolated from  
95 wheat residues, despite the dense population of this habitat with a high diversity of microbial  
96 taxa [16].

97 The taxonomic structure of microbial communities associated with maize [17] and  
98 wheat [16] residues has recently been described under natural conditions. In addition to *Z.*  
99 *tritici*, the microbial communities associated with wheat include *Clonostachys* sp.,  
100 *Aureobasidium* sp., *Chaetomium* sp. and *Cryptococcus* sp. [16], all of which are potential  
101 competitors. However, the presence of microorganisms in the same ecological niche, as  
102 highlighted in such descriptive approaches, does not necessarily mean that interactions  
103 actually occur between them. Many other non-interacting microorganisms (pathogens,  
104 endophytes) are also present on the residues. Moreover, microbial communities change during  
105 the physical degradation of the residues, probably modifying interactions between  
106 microorganisms over time [16]. Ecological network analysis has made it possible to detect  
107 putative interactions between microorganisms. For instance, Jakuschkin *et al.* [13] detected  
108 significant changes in foliar fungal and bacterial communities following the infection of  
109 pedunculate oak with *Erysiphe alphitoides* (the causal agent of oak powdery mildew), and  
110 Cobo-Diaz *et al.* [17] identified candidate antagonists of toxigenic *Fusarium* spp. among the  
111 species present in maize residues. The use of co-occurrence networks in these two studies  
112 highlighted a set of bacteria and fungi that might be useful for managing plant pathogens.

113 In this study, our goal was to identify fungi and bacteria potentially interacting with *Z.*  
114 *tritici* during its sexual reproduction on wheat residues. To this end, we compared the  
115 structure of microbial communities associated with wheat residues with and without *Z. tritici*  
116 inoculation, by metabarcoding, combining linear discriminant analyses (LDA) and ecological  
117 network analyses. The response of microbial communities to *Z. tritici* infection was assessed

118 during the interepidemic period between two successive crops, for two sets of wheat residues,  
119 one left outdoors in contact with the soil, and the other left outside but not in contact with the  
120 soil, at different sampling dates during two consecutive years. The diversity of experimental  
121 conditions was expected to lead to the establishment of different microbial communities  
122 according to the origin of the constitutive taxa (plant or soil), thereby increasing the  
123 probability of detecting effects of *Z. tritici* on the residue microbiome, and of the residue  
124 microbiome on *Z. tritici*.

125

## 126 **Results**

127

### 128 **Overall diversity of the bacterial and fungal communities on residues**

129 The response of the residue microbiome to *Z. tritici* inoculation was assessed by  
130 analyzing the composition of the fungal and bacterial communities of wheat residues, after  
131 inoculation with *Z. tritici* ( $n=240$ ) or in the absence of inoculation ( $n=240$ ). We also  
132 investigated the impact of cropping season ( $n=2$ ), season ( $n=4$ ), and soil contact ( $n=2$ ) on the  
133 dynamics of these communities (see materials and methods for a detailed explanation of the  
134 experimental design; **Figure 1**).

135 We investigated the structure of the residue microbiome by analyzing the v4 region of  
136 the 16S rRNA gene and ITS1. Overall, 996 bacterial amplicon sequence variants (ASVs) and  
137 520 fungal ASVs were obtained from 390 and 420 samples, respectively. Some samples (July  
138 2016) were removed from the analysis due to the co-amplification of chloroplasts.

139 The high relative abundance (RA) of ASVs affiliated to *Z. tritici* in samples collected in  
140 July 2016 ( $21.5\pm 9.8\%$ ) and 2017 ( $30.3\pm 7.1\%$ ) highlights successful colonization of the wheat  
141 tissues by this pathogen following inoculation (**Figure 2**). However, the RA of *Z. tritici*  
142 rapidly decreased to  $2\pm 1.64\%$  and  $1.4\pm 0.9\%$  on residues not in contact with the soil (“above

143 ground” residues) collected in October 2016 and 2017, respectively, and this species was  
144 below the limit of detection in December and February. For residues in contact with soil, this  
145 decrease occurred more rapidly, with *Z. tritici* already undetectable in samples collected in  
146 October.

147 Alpha diversity, estimated with the Shannon index, was low in July for both bacterial  
148 ( $2.70\pm 0.75$ ) and fungal communities ( $1.82\pm 0.19$ ; **Suppl. Figure 1**). A gradual increase was  
149 then observed during residue degradation. *Z. tritici* inoculation had no impact on bacterial  
150 alpha-diversity, but decreased fungal diversity (Kruskal-Wallis:  $p = 0.008$ ). More specifically,  
151 bacterial diversity was higher in inoculated residue samples in July 2017 ( $2.92\pm 0.80$  for  
152 inoculated samples versus  $2.47\pm 0.6$  for non-inoculated samples; Wilcoxon:  $p = 0.022$ ), but no  
153 such difference was detected for the other sampling dates. Conversely, for fungal  
154 communities, inoculation had no effect in July, but led to a significant decrease in diversity in  
155 subsequent months during the second cropping season (October and December 2017, for the  
156 two soil contact conditions).

157 Beta diversity analysis (Bray-Curtis index) showed large dissimilarities between  
158 bacterial community composition in July and at the other sampling dates, as illustrated in the  
159 hierarchical clustering of the samples, justifying separate analyses and MDS representations  
160 (**Figure 3**). Inoculation with *Z. tritici* had a minor effect on bacterial communities, with only  
161 5% of the variance explained for samples collected in July (PERMANOVA:  $p = 0.004$ ). By  
162 contrast, in the same month, inoculation was the structuring factor for fungal communities,  
163 accounting for 33% of the variance (PERMANOVA:  $p = 0.001$ ). For subsequent samplings  
164 (October, December and February), temporal conditions (seasonality and cropping season)  
165 were the main factors influencing fungal communities. Soil contact was the main structuring  
166 factor for bacterial communities, with a stronger effect than seasonality or cropping season  
167 (**Table 1**).

168

## 169 **Impact of contact with the soil on microbial communities**

170 The significant impact of soil contact on microbial communities highlighted differences  
171 in the process of wheat residue colonization. MDS analysis suggested that the communities of  
172 “above ground” residue samples collected in October were less different from those collected  
173 in July than from the communities of “soil contact” samples also collected in October (**Figure**  
174 **4**). Contact with the soil, therefore, caused a greater change in communities, suggesting  
175 competition between plant-associated taxa and soil-borne taxa. Taxonomic differences  
176 between the communities present on residues in contact with the soil and those present in  
177 above ground residues were highlighted in linear discriminant analysis (LDA).

178 Some classes of taxa (e.g. *Bacilli*, *Sphingobacteria*, *Betaproteobacteria*,  
179 *Dothideomycetes*, *Pezizomycetes*) were particularly abundant only in above ground residues,  
180 suggesting that they were mostly derived from the plant. By contrast, other classes (e.g.  
181 *Alphaproteobacteria*, *Agaricomycetes*, *Cytophagia*, *Gammaproteobacteria*) were more  
182 prevalent in residues in contact with soil, suggesting that they originated from the soil (**Suppl.**  
183 **Figure 2**). The abundance of some classes varied with cropping season (e.g. *Flavobacteria*).  
184 Soil contact had a large impact for *Dothideomycetes* and *Bacilli*, which were highly abundant  
185 in July, but rapidly decreased in frequency when the residues were in contact with the soil.  
186 *Pezizomycetes*, absent in July, colonized only the above ground residues. Conversely, the  
187 percentage of reads associated with *Alphaproteobacteria*, which was quite high in July, and  
188 *Cytophagia*, which was low in July, increased over time, particularly in residues in contact  
189 with the soil. Similarly, *Agarycomycetes*, which was completely absent in July, colonized  
190 only residues in contact with the soil.

191 At the genus level, 87 (excluding “unclassified”) of the 273 genera (60/190 for bacteria;  
192 27/83 for fungi) identified displayed differences in abundance between above ground residues



193 and residues in contact with the soil, for at least one date (**Figure 4**). For example, *Bosea*,  
194 *Rhizobium*, *Nocardioides*, *Pseudomonas*, and *Sphingomonas* were more abundant in residues  
195 in contact with the soil, whereas *Cladosporium*, *Massilia*, *Paracoccus*, *Stagonospora* and  
196 *Cryptococcus* were more abundant in above ground residues.

197

#### 198 **Impact of *Z. tritici* inoculation on microbial communities**

199 The influence of *Z. tritici* on the RA of residue microbiome members was assessed,  
200 through LDA scores. In total, the RA of 115 ASVs (74 bacterial ASVs and 41 fungal ASVs)  
201 was significantly affected by *Z. tritici* inoculation, for at least one sampling date (listed in  
202 **Suppl. Figure 3**). The effect of inoculation on microbial communities persisted throughout  
203 the experiment, despite the absence of *Z. tritici* detection from December onwards (**Figure 2**).  
204 ASVs with significant differences in RA decreased over time for residues in contact with the  
205 soil (**Suppl. Table 1**). By contrast, for above ground residues, the number of differential  
206 ASVs increased until December, in both cropping seasons (20 ASVs in December 2016-2017;  
207 31 ASVs in December 2017-2018).

208 Inoculation with *Z. tritici* decreased the number of fungal ASVs, including those  
209 affiliated to *Sarocladium*, *Gibellulopsis* and *Blumeria*, and increased the number of bacterial  
210 ASVs affiliated to *Curtobacterium* and *Brachybacterium* (listed in **Suppl. Figure 3**). The  
211 ASVs affected by inoculation differed between above ground residues and residues in contact  
212 with soil. The pattern of change (i.e. promoted or inhibited by inoculation) was always the  
213 same within a given year, regardless of soil contact conditions. For example,  
214 *Brachybacterium* and *Curtobacterium* were promoted by inoculation, in both soil contact  
215 conditions, whereas *Sarocladium* was inhibited by inoculation, in both soil contact conditions.

216

#### 217 **Impact of the actual presence of *Z. tritici* on microbial communities**

218 Microbial analysis networks combining bacterial and fungal datasets were used to  
219 predict the potential interactions between *Z. tritici* and members of microbial communities  
220 associated with wheat residues.

221 ***Dynamics of ecological interaction networks*** – The dataset was split according to the  
222 effects previously described (cropping season, seasonality, soil contact conditions). Six  
223 ecological interaction networks were generated per experimental year, corresponding to  
224 residue samples in contact with the soil and above ground residues, collected in October,  
225 December, and February (**Figure 5**). The networks for July are presented in **Suppl. Figure 4**.  
226 The mean number of nodes in the network ( $205.3 \pm 47.5$ ) increased over the season (**Suppl.**  
227 **Table 1**). Overall, networks were very sparse, with a mean node degree of  $2.76 \pm 0.43$ . For  
228 each network, the positive/negative edge ratio decreased over time, reaching 1.0-1.5 in  
229 February. Most nodes were common to October, December and February. *Z. tritici* was one of  
230 the fungi with the largest number of degrees and greatest betweenness (measurement of  
231 centrality in a graph based on the shortest paths) for above ground samples in October. By  
232 contrast, for samples in contact with soil, it was absent the first year and had low betweenness  
233 and degree values for the second year (**Figure 6**).

234 ***Subnetworks highlighting direct interactions between Z. tritici and other***  
235 ***microorganisms*** – Ecological interaction networks were combined with LDA to investigate  
236 the interactions between *Z. tritici* and members of the microbial communities of residues  
237 (**Figure 7**). Only 13 of the 115 ASVs affected by inoculation (LDA) were in direct interaction  
238 with *Z. tritici*, indicating an indirect effect of *Z. tritici* on the community (no direct connection  
239 between the microorganisms).

240 Microorganisms with the same differential pattern (i.e. “promoted by inoculation” or  
241 “promoted in the absence of inoculation”) did not interact negatively with each other in  
242 networks. Conversely, microorganisms with opposite differential patterns systematically

243 interacted negatively with each other. These results highlight the consistency of the LDA and  
244 ecological interaction network analysis approaches.

245 The subnetworks generated with microorganisms presenting differential relative  
246 abundances and their adjacent nodes were strongly connected: each subnetwork consisted of a  
247 principal component and, in some cases, smaller components of less than four nodes (**Figure**  
248 **7**).

249 Only a few direct interactions between *Z. tritici* and other microorganisms were  
250 highlighted in ecological interaction networks. Some ASVs affiliated to the same genus had  
251 opposite interaction trends with *Z. tritici*, such as *Fusarium* ASVs in July 2017, or  
252 *Cladosporium* ASVs in October 2016, consistent with the findings of LDA analyses. In some  
253 cases, the same ASV had different interaction trends at different sampling dates or in different  
254 years. This was the case for *Acremonium* ASVs (negative interaction in October 2016,  
255 positive interaction in October 2017). Some genera, such as *Blumeria*, *Sarocladium*, and  
256 *Penicillium*, interacted only negatively with *Z. tritici*. *Symmetrospora*, *Brachybacterium*, and  
257 *Monographella* interacted only positively with *Z. tritici*.

258

## 259 **Discussion**

260

261 By sequencing the microbial communities of 420 samples of wheat residues, we  
262 obtained a total of 996 bacterial ASVs and 520 fungal ASVs. Using this large dataset, we  
263 estimated the potential interactions occurring between a plant pathogen (*Z. tritici*) and the  
264 members of microbial communities associated with crop residues in field conditions. By  
265 combining two approaches — LDA and network analysis — we were able to demonstrate an  
266 effect of pathogen infection, even after disappearance of the pathogen, on the structure and  
267 composition of the microbial communities during residue degradation.

268

## 269 **Effect of soil contact on microbial communities**

270 Our aim here was not to characterize the organisms colonizing wheat residues, but our  
271 findings nevertheless highlight major changes in the microbial community over time for  
272 residues in contact with soil. The taxa favored in above ground residues, such as  
273 *Cladosporium*, *Alternaria*, *Pedobacter* and *Massilia*, were already present on the plant. This  
274 is consistent with previous findings showing a decrease in the abundance of these plant-  
275 associated taxa during the degradation of residues in contact with soil and the colonization of  
276 these residues with soil-borne competitors, such as *Chaetomium*, *Torula*, and *Nocardioides*  
277 [16]. Some fungal genera not present in July were favored by above ground conditions (e.g.  
278 *Cryptococcus*, *Stagonospora*, and *Myrmecridium*). This finding is consistent with our  
279 knowledge of fungal dispersal processes, mostly involving aerial spores.

280

## 281 **Disappearance of *Z. tritici* during residue degradation**

282 *Z. tritici* rapidly disappeared between October and December. This finding is surprising  
283 in light of the quantitative epidemiological data acquired for the same plot, which suggested  
284 that *Z. tritici* ascospores may be ejected from residues until March [3,37]. The observed  
285 disappearance of *Z. tritici* may be due to lower levels of contamination of adult wheat plants  
286 in residues than would be achieved in the field after natural infection. Indeed, in field  
287 conditions, *Z. tritici* establishes itself on all parts of the plant (leaves, but also sheaths and  
288 stems) through multiple secondary infections, driven by the repeated splash dispersal of  
289 asexual spores, leading to an accumulation of contaminating raindrops at the points of  
290 insertion of the leaf sheaths. The single inoculation event in the greenhouse resulted in  
291 contamination principally of the leaves, the organs most exposed to spraying, with relatively  
292 little contamination of the stems and sheaths, the parts of the plant most resistant to

293 degradation. Indeed, the results of a previous study [16] support this hypothesis: in the same  
294 field, during the same season, *Z. tritici* was detected in wheat residues originating from plants  
295 grown in natural conditions until February, and even May, with a similar metabarcoding  
296 approach.

297

### 298 **Effect of *Z. tritici* on microbial communities**

299 Endophytes and pathogens induce changes in plant tissues (e.g. necrosis), which may  
300 themselves modify the microbial communities inhabiting the plant (e.g. impact of secondary  
301 saprophytes or opportunistic pathogens [38]; selection of microorganisms by secondary  
302 metabolites produced by microorganisms or the plant; [39,40]). This general phenomenon  
303 may explain the impact of *Z. tritici* on the microbial communities observed in both LDA and  
304 network analysis. The impact of *Z. tritici* on residues, even after its disappearance between  
305 October and December, persisted until February, particularly for fungal communities. Within  
306 microbial networks, *Z. tritici* was one of the keystone taxa, despite its low abundance, in  
307 above ground residues in October (**Suppl. Figure 5**). The high levels of *Z. tritici* in July  
308 (between 10 and 40% of reads) account for its central position in the network. The number of  
309 microorganisms displaying changes in abundance due to *Z. tritici* inoculation decreased  
310 during residue degradation. This finding highlights the resilience of the community (i.e. its  
311 ability to return to its original composition after a disturbance, in this case, *Z. tritici*  
312 inoculation) [41].

313

### 314 **Specific interactions with *Z. tritici***

315 Most of the predicted interactions with *Z. tritici* involved fungi, such as *Fusarium*,  
316 *Blumeria* or *Cladosporium*. *Z. tritici* infection has been shown to be associated with the  
317 accumulation of H<sub>2</sub>O<sub>2</sub> [42]. This compound is known to inhibit biotroph fungal pathogens

318 [43], such as *Blumeria graminis* [44,45]. This may explain the negative interaction between *Z.*  
319 *tritici* and *B. graminis* in July and October 2017-2018. In addition, *Z. tritici* infection induces  
320 leaf necrosis, potentially decreasing wheat susceptibility to *B. graminis*, due to a significant  
321 physiological interaction during the latent, endophytic period of *Z. tritici* development [45].  
322 H<sub>2</sub>O<sub>2</sub> is also known to promote necrotrophic agents, such as *Fusarium*. We detected both  
323 positive and negative interactions between *Z. tritici* and *Fusarium*, depending on the ASV  
324 considered. On adult wheat plants, such differential interactions have been demonstrated in  
325 log-linear analyses [46], with both species giving positive results on stem bases and negative  
326 results on the upper parts of stems. Positive interactions between *Z. tritici* and *Cladosporium*  
327 have also been demonstrated on adult plants [46], consistent with our findings for wheat  
328 residues. These results lend a biological meaning to the interactions detected, confirming the  
329 relevance of network analyses for highlighting ecological interactions within crop residue  
330 communities.

331 *Trichoderma* was more abundant in residues from wheat plants inoculated with *Z. tritici*  
332 (July 2016), as shown by LDA (**Suppl. Figure 4**). Conversely, *Epicoccum* and *Cryptococcus*  
333 were more abundant in residues from non-inoculated wheat plants (October 2016). The  
334 overabundance of those taxa, described as biocontrol agents in previous studies [34–36,47],  
335 was influenced by the presence of the pathogen. However, no direct interactions between *Z.*  
336 *tritici* and these species could be established. This exemplifies the difficulties highlighting  
337 beneficial species within complete microbial communities. These difficulties are not specific  
338 to the residue compartment and also apply to the spermosphere [48], phyllosphere [49] and  
339 rhizosphere compartments [14,50].

340

341 **Other interactions**

342 Other interactions between ASVs highlighted in the network analysis were examined in  
343 light of published results for fungal pathogens of cereals. For instance, it has already been  
344 shown that *B. graminis* growth on barley is inhibited by *Trichoderma harzianum* [51] and  
345 *Stagonospora norodum* [52], that *Stenetrophomas maltophila* attenuates the seedling blight of  
346 wheat caused by *F. graminearum* [53], that *Acremonium zeae* has antibiotic activity against  
347 *Fusarium verticillioides* [54], and that *Chaetomium sp.* produces compounds (e.g. chaetomin)  
348 active against *Alternaria triticimaculans* [34]. Conversely, certain non-pathogenic bacteria  
349 were shown to be associated with significantly more disease on wheat caused by *B. graminis*  
350 and *Z. tritici* and to “help” *Phaeosphaeria nodorum* to infect wheat tissues [55]. Newton *et*  
351 *al.* [38] has proposed the hypothesis of “induced susceptibility” to explain such an interaction  
352 between bacteria and biotroph fungal pathogens.

353 The analysis of ecological network also suggested that intra-kingdom interactions were  
354 favoured over inter-kingdom interactions in certain conditions (**Suppl. Table 2**). This may  
355 reflect differences in ecological niches and dynamics, as illustrated by the temporal changes  
356 in microbial communities over a season, with a densification of the networks during residue  
357 degradation. Further investigations are required to determine whether inter- or intra-kingdom  
358 interactions are more intense, and thus more promising for use in biocontrol engineering.  
359 Should we preferentially focus on fungal communities to improve the management of a fungal  
360 disease, and on bacterial communities to improve the management of a bacterial disease?

361

### 362 **Identification of beneficial species, and potential biocontrol agents**

363 Network models provide new opportunities for enhancing disease management and can  
364 be helpful for biocontrol. Our study, combining LDA and ecological network analyses based  
365 on a metabarcoding approach and differential conditions (plants inoculated with a pathogen or  
366 left non-inoculated; plant residues in contact with soil vs. residues not in contact with the

367 soil), fits into the framework described by Poudel *et al.* [56], which considers several types of  
368 network analyses, including pathogen-focused analyses, taking into account diseased and  
369 healthy plant hosts, with a view to elucidating direct and indirect pathogen-focused  
370 interactions within the pathobiome.

371 Network analyses revealed no significant direct interactions between *Z. tritici* and  
372 microorganisms reported to be useful biocontrol agents. However, pathogen infection had a  
373 strong effect on the entire microbial community present in residues during the course of their  
374 degradation. Most of the interactions were difficult to interpret. Several interactions appeared  
375 to be transient, changing over time with residue degradation, and their presence or absence  
376 depended on whether the residues were in contact with the soil. This suggests that interactions  
377 between microorganisms are not very stable, and can be modified by changes in the  
378 environment, for example, or by the arrival of a new microorganism.

379 The neglect of complex interactions between biocontrol agents and their biotic  
380 environment (the plant, the soil and their microbiomes), the physical and chemical properties  
381 of which change over time, may account for lower levels of efficacy in field conditions than  
382 in laboratory conditions (concerning the phyllosphere, e.g. [38], but also the residue  
383 compartment, e.g. [57]). Indeed, several studies have demonstrated the value of studying the  
384 effect of entire communities on biotic and abiotic stresses rather than the effects of single  
385 species. For example, resistance to *B. cinerea* in *Arabidopsis thaliana* was shown to be not  
386 due to a single species, but to the action of the microbiome as a whole [58]. By comparing the  
387 structure of microbial communities associated with *Brassica rapa* plants inoculated with the  
388 root pathogen *Plasmodiophora brassicae*, Lebreton *et al.* [14] showed significant shifts in the  
389 temporal dynamics of the root and rhizosphere microbiome communities during root  
390 infection. Moreover, the rhizospheres of plants infected with *P. brassicae* were significantly



391 more frequently colonized with a *Chytridiomycota* fungus, suggesting interactions between  
392 these two microorganisms.

393 The most frequently studied cases of microbial community effects include “suppressive  
394 soils”, which provide defense against soil-borne pathogens, rendering them unable to establish  
395 themselves or to persist in the soil or the plant [59]. The basis and dynamics of this disease  
396 suppression vary, and suppression may be general or specific, under the control of antibiotic-  
397 producing *Pseudomonas* or *Streptomyces* populations, for example [60]. Differences in the  
398 composition, structure and diversity of microbial communities on crop residues remain poorly  
399 understood, and further studies are required to determine the potential for use in biocontrol  
400 not of single agents, but of microbial communities, as for these suppressive soils. Despite this  
401 ecological reality, the current perception of biocontrol engineering is still too often limited to  
402 the action of a single species, even a single strain, with a direct, strong and durable effect  
403 against a plant pathogen.

404

#### 405 **Potential utility of the residue microbiome**

406 Improving our understanding of the relationship between biodiversity and ecosystem  
407 functioning will require the development of methods integrating microorganisms into the  
408 framework of ecological networks. Exhaustive descriptions of microbial diversity combined  
409 with network analysis are particularly useful for identifying species within microbial  
410 communities of potential benefit for disease management [56]. By revealing antagonistic  
411 interactions between pathogen species (e.g. *Z. tritici*) and other microorganisms, our study  
412 suggests that this strategy could potentially improve the control of residue-borne diseases, as  
413 suggested by another recent study on *Fusarium* [17]. This strategy, which has been developed  
414 separately for the plant [61,62] and soil [14,50,63] compartments, would undoubtedly benefit  
415 from further development on crop residues. Indeed, decreasing the presence of pathogens on

416 residues during the interepidemic period can decrease disease development on subsequent  
417 crops [21]. The strategy developed here can be viewed as a proof-of-concept for the use of  
418 crop residues as a particularly rich ecological compartment containing a high diversity of taxa  
419 originating from both the plant and soil compartments, and for the use of *Z. tritici*-wheat as a  
420 model pathosystem. Understanding the complex interactions between a pathogen, crop  
421 residues and other microbiome components in the shaping of a plant-protective microbiome is  
422 essential, to improve the efficacy of biocontrol agents and to preserve existing beneficial  
423 equilibria through the adoption of appropriate agricultural practices.

424

## 425 **Methods**

426

427 We investigated the effect of *Z. tritici* on the diversity of the wheat microbiome and the  
428 effect of the wheat microbiome on *Z. tritici*, by characterizing the composition of the  
429 microbial communities of 420 residue samples (210 per year) from plants with and without  
430 preliminary *Z. tritici* inoculation. The residues were placed outdoors, either directly in contact  
431 with the soil in a field plot or “above ground”, i.e. not in contact with the soil, to assess the  
432 effect of their colonization by microorganisms originating from the soil, the plant and the air  
433 on the saprophytic development of *Z. tritici*. We investigated the persistence of interactions  
434 between the pathogen and the whole microbial community, and changes in those interactions  
435 over time, by sampling the residues before exposure to outdoor conditions (in July), and every  
436 two months thereafter (in October, December, and February) (**Figure 1**).

437

### 438 **Preparation of wheat residues**

439 The 420 wheat residue samples were obtained from 60 winter wheat cv. Soissons plants  
440 grown in a greenhouse in each of the two years of the study, as described in [64]: two weeks

441 after sowing, seedlings were vernalized for eight weeks in a growth chamber and then  
442 transplanted into pots. Three stems per plant were retained. Half the wheat plants were  
443 inoculated with a mixture of four *Z. tritici* isolates (two Mat1.1. isolates and two Mat1.2  
444 isolates; [65]) to ensure that sexual reproduction occurred as in natural conditions. This  
445 equiproportional conidial suspension was prepared and adjusted to a concentration of  $2 \times 10^5$   
446 spores.mL<sup>-1</sup>, as previously described [64]. Thirty plants were inoculated at the late heading  
447 stage in early May, by spraying with 10 mL of inoculum suspension. The other thirty plants  
448 were sprayed with water, as a control. Inoculated and non-inoculated plants were enclosed in  
449 transparent plastic bags for three days to ensure moist conditions favoring pathogen infection.  
450 *Septoria tritici* blotch lesions appeared three to four weeks after inoculation (**Figure 1A**). All  
451 plants were kept in the same greenhouse compartment until they reached complete maturity  
452 (mid-July).

453 For each “inoculated” and “non-inoculated” condition, stems and leaves were cut into 2  
454 cm-long pieces and homogenized to generate the “wheat residues”, which were then  
455 distributed in 105 nylon bags (1.4 g per bag; **Figure 1B**) for each set of inoculation  
456 conditions, in each year.

457

#### 458 **Exposure of residues to natural conditions**

459 Ninety nylon bags were deposited in contact with the soil in a field plot (the “soil  
460 contact” treatment) or without contact with the soil (“above ground” residue treatment).  
461 Thirty batches of residues (15 inoculated and 15 non-inoculated) were used to characterize the  
462 communities present in July before the exposure of the residues in the nylon bags to natural  
463 conditions. The field plot (“OWO” in [16]; Grignon experimental station, Yvelines, France;  
464 48°51'N, 1°58'E) was the same in both cropping seasons. It was sown with wheat in 2015-  
465 2016, with oilseed rape in 2016-2017, and with wheat in 2017-2018. The 90 bags for the “soil

466 contact” treatment were deposited in the OWO field plot (**Figure 1C**) in late July, at 15  
467 sampling points 20 m apart (three “inoculated” and three “non-inoculated” bags at each  
468 sampling point). The 90 bags of the “above ground” treatment were placed on plastic grids  
469 exposed to outdoor conditions and located about 300 m from the OWO field plot (**Figure**  
470 **1D**).

471 We assessed the impact of seasonality on the fungal and bacterial communities on  
472 residues by collecting samples of each “inoculated” and “non-inoculated” treatment at three  
473 dates (October, December and February): 15 bags from plastic grids (“above ground”  
474 treatment) and one bag from each sampling point in the field (“soil contact” treatment) At  
475 each date, nylon bags were opened, the residues were rinsed with water and air-dried in  
476 laboratory conditions. Residues were then crushed with a Retsch™ Mixer Mill MM 400 for  
477 60 seconds at 30Hz with liquid nitrogen in a Zirconium oxide blender.

478

#### 479 **Total DNA extraction**

480 Total DNA was extracted with the DNeasy Plant Mini kit (Qiagen, France), with a  
481 slightly modified version of the protocol recommended by the manufacturer. Powdered  
482 residues (20 mg), 450 µL of Buffer AP1 preheated to 60°C, RNase A and Reagent DX (450:  
483 1: 1) were mixed vigorously for 15 s in a 2 mL Eppendorf tube. Buffer P3 (130 µL) was  
484 added to each tube, which was then shaken manually for 15 s, incubated at -20°C, and  
485 centrifuged (1 min, 5000 g). The supernatant (450 µL) was transferred to a spin column and  
486 centrifuged (2 min, 20000 g). The filtrate (200 µL) was transferred to a new tube, to which  
487 sodium acetate (200 µL, 3 M, pH 5) and cold 2-propanol (600 µL) were added. DNA was  
488 precipitated by incubation at -20°C for 30 min and recovered by centrifugation (20 min,  
489 13000 g). The pellet was washed with cold ethanol (70%), dried, and dissolved in 50 µL of  
490 AE buffer.

491

## 492 **PCR and Illumina sequencing**

493 Fungal and bacterial communities profiles were analyzed by amplifying ITS1 and the v4  
494 region of the 16S rRNA gene, respectively. Amplifications were performed with ITS1F/ITS2  
495 [66] and 515f/806r [67] primers. All PCRs were run in a total volume of 50  $\mu$ L, with 1x  
496 Qiagen Type-it Multiplex PCR Master Mix (Type-it® Microsatellite PCR kit Cat  
497 No./ID: 206243), 0.2  $\mu$ M of each primer, 1x Q-solution® and 1  $\mu$ l DNA (approximately 100  
498 ng). The PCR mixture was heated at 95°C for 5 minutes and then subjected to 35 cycles of  
499 amplification [95°C (1 min), 60°C (1 min 30 s), 72°C (1 min)] and a final extension step at  
500 72°C (10 min). PCR products were purified with Agencourt® AMPure® XP (Agencourt  
501 Bioscience Corp., Beverly, MA). A second round of amplification was performed with 5  $\mu$ l of  
502 purified amplicons and primers containing Illumina adapters and indices. PCR mixtures were  
503 heated at 94°C for 1 min, and then subjected to 12 cycles of amplification [94°C (1 min),  
504 55°C (1 min), 68°C (1 min)] and a final extension step at 68°C (10 min). PCR products were  
505 purified and quantified with Invitrogen QuantIT™ PicoGreen®. Purified amplicons were  
506 pooled in equimolar concentrations, and the final concentration of the library was determined  
507 with the qPCR NGS library quantification kit (Agilent). Libraries were sequenced in four  
508 independent runs with MiSeq reagent kit v3 (600 cycles).

509

## 510 **Sequence processing**

511 Runs were analyzed separately. Primer sequences were first cut off in the fastq files  
512 with Cutadapt [68]. Files were then processed with DADA2 v.1.8.0 [69] according to the  
513 recommendations for the “DADA2 Pipeline Tutorial (1.8)” workflow [70], with quality  
514 trimming adapted for each run (**Suppl. Table 3**).

515 A mock sample consisting of equimolar amounts of DNA from known microorganisms  
516 was included in each run (see **Suppl. Figure 6**) to establish a detection threshold for spurious  
517 haplotypes. At a threshold of  $\leq 0.3$  % of the size of the library, amplicon sequence variants  
518 (ASVs) were considered spurious and were removed from the sample. We used the naive  
519 Bayesian classifier on RDP trainset 14 [71] and the UNITE 7.1 database [72] to assign ASVs.  
520 ASVs as assigned to chloroplasts (for bacteria) or unclassified at the phylum level (for  
521 bacteria and fungi) were also removed from each sample. Due to large proportion of  
522 chloroplast sequences among the 16S rRNA gene products, all samples from July 2017 were  
523 removed from the analysis.

524

### 525 **Differential community analysis**

526 For microbial community analyses, the total library size of each sample was  
527 standardized by normalization by proportion. The experimental conditions taken into account  
528 were cropping season (2016-2017 and 2017-2018), seasonality (four sampling dates: July,  
529 October, December, and February), inoculation with *Z. tritici* (inoculated and non-inoculated),  
530 soil contact (soil contact and above ground treatments). The Shannon diversity index was  
531 used to assess the effect of each set of conditions on fungal and bacterial diversity. The  
532 divergence of microbial communities between samples was assessed by calculating the Bray-  
533 Curtis dissimilarity matrix with the phyloseq package (v 1.24.2 [73]), and then illustrated by  
534 MDS and clustering based on the average linkage method (ape package v 5.2. [74]).  
535 PERMANOVA was performed with the “margin” option, to test the effect of each factor on  
536 communities (adonis2 function, vegan package [75]).

537 A linear discriminant analysis (LDA) implemented in Galaxy [76] (LefSe,  
538 <http://huttenhower.org/galaxy>) was used to characterize the differential abundances of fungal  
539 and bacterial taxa between each soil contact condition and each *Z. tritici* inoculation

540 condition. In this analysis, differences in the relative abundance of taxa between treatments  
541 were evaluated with a Kruskal-Wallis test; a Wilcoxon test was used to check, by pairwise  
542 comparisons, whether all subclasses agreed with the trend identified in the Kruskal-Wallis  
543 test. The results were used to construct an LDA model, to discriminate between taxa in the  
544 different conditions. For the comparison between “soil contact” and “above ground”  
545 treatments, inoculation condition was used as a subclass, with the Wilcoxon test alpha value  
546 set at 0.05, and the alpha value of the Kruskal-Wallis test set at 0.01. For the comparison  
547 between “inoculated” and “non-inoculated” treatments, the alpha value of the Kruskal Wallis  
548 test was set at 0.01 (no subclasses). For both analyses, the threshold for the LDA analysis  
549 score was set at 2.0.

550

### 551 **Ecological interaction network analyses**

552 For characterization of interactions within the different wheat residue microbial communities,  
553 we used ecological interactions networks calculated with SPIEC-EASI [77] for combined  
554 bacterial and fungal datasets [78]. The same parameters were used for all networks. The non-  
555 normalized abundance dataset was split on the basis of sampling date and soil contact  
556 condition. Each of the datasets included 30 samples (15 inoculated samples and 15 non-  
557 inoculated samples). Infrequent ASVs were filtered out by defining a threshold of a minimum  
558 of six occurrences. We used the neighborhood selection as graphical inference model  
559 (Meinshausen and Bühlmann MB method) with SPIEC-EASI, as this method has been shown  
560 to outperform most of the other available methods (e.g. CCREPE, SPARCC, SPIEC-EASI  
561 (glasso)) [77]. The StARS variability threshold was set at 0.05. Networks were then analyzed  
562 with the igraph package (version 1.2.2. [79]). Scripts for network construction and analysis  
563 are available from GitHub (see Availability of data and materials).

564

## 565 **Subnetworks for analysis of the *Z. tritici* pathobiome**

566 We used a dual approach to characterize interactions between *Z. tritici* and the other  
567 taxa, based on: (i) the LDA scores obtained in differential analyses between *Z. tritici*  
568 inoculation conditions (“inoculated” and “non-inoculated” treatments); (ii) ecological network  
569 analysis. LDA identified taxa affected by inoculation conditions (definition of classes for  
570 samples) and network analysis identified interactions at the sample scale (without prior  
571 assumptions). Subnetworks of differential ASVs and their adjacent nodes were established by  
572 combining these two approaches. Subnetworks were visualized with Cytoscape V. 3.6.1 [80]  
573

## 574 **Acknowledgments**

575 This study was performed in collaboration with the GeT core facility, Toulouse, France  
576 (<http://get.genotoul.fr/>), supported by *France Génomique National Infrastructure*, funded as  
577 part of the “*Investissement d’avenir*” program managed by *Agence Nationale pour la*  
578 *Recherche* (contract ANR-10-INBS-09). We thank Angelique Gautier for preparing the  
579 mocks, Nathalie Retout (INRA BIOGER) and Christophe Montagnier (INRA Experimental  
580 Unit, Thiverval-Grignon) for technical assistance, Anne-Lise Boixel (INRA BIOGER) for  
581 assistance with statistical analyses, and Marie-Hélène Balesdent (INRA, UMR BIOGER) for  
582 her comments and suggestions to improve the manuscript. We thank Julie Sappa for her help  
583 correcting our English.

584

## 585 **Funding**

586 This study was supported by a grant from the European Union Horizon Framework 2020  
587 Program (EMPHASIS Project, Grant Agreement no. 634179) covering the 2015-2019 period.  
588

## 589 **Availability of data and materials**



590 The raw sequencing data are available from the European Nucleotide Archive (ENA) under  
591 study accession number PRJEB31818. We provide the command-line script for data analysis  
592 and all necessary input files via GitHub  
593 (<https://github.com/LydieKerdraon/MicrobialNetworkAnalysis-WheatResidues>).

594

### 595 **Authors' contributions**

596 LK, FS, VL, MB conceived the study, participated in its design, and wrote the manuscript. LK  
597 conducted the experiments and analyzed the data. FS and VL supervised the project. All  
598 authors read and approved the final manuscript.

599

### 600 **Ethics approval and consent to participate**

601 Not applicable

602

### 603 **Consent for publication**

604 Not applicable

605

### 606 **Competing interests**

607 The authors declare that they have no competing interests.

608

### 609 **References**

610 [1] Fones H, Gurr S. The impact of *Septoria tritici* blotch disease on wheat: An EU  
611 perspective. *Fungal Genet Biol* 2015;79:3–7.

612 [2] Quaedvlieg W, Kema G, Groenewald J, Verkley G, Seifbarghi S, Razavi M, et al.  
613 *Zymoseptoria* gen. nov.: a new genus to accommodate *Septoria*-like species occurring on  
614 graminicolous hosts. *Persoonia Mol Phylogeny Evol Fungi* 2011;26:57.

- 615 [3] Suffert F, Sache I, Lannou C. Early stages of *Septoria tritici* blotch epidemics of winter  
616 wheat: build-up, overseasoning, and release of primary inoculum. *Plant Pathol*  
617 2011;60:166–77.
- 618 [4] Suffert F, Delestre G, Gélisse S. Sexual reproduction in the fungal foliar pathogen  
619 *Zymoseptoria tritici* is driven by antagonistic density-dependence mechanisms 2018.  
620 *Microb Ecol* 2018;77:110–23.
- 621 [5] Cools HJ, Fraaije BA. Are azole fungicides losing ground against *Septoria* wheat disease?  
622 Resistance mechanisms in *Mycosphaerella graminicola*. *Pest Manag Sci* 2008;64:681–4.
- 623 [6] Estep LK, Zala M, Anderson NP, Sackett KE, Flowers M, McDonald BA, et al. First  
624 report of resistance to QoI fungicides in North American populations of *Zymoseptoria*  
625 *tritici*, causal agent of *Septoria tritici* blotch of wheat. *Plant Dis* 2013;97:1511.
- 626 [7] Estep LK, Torriani SFF, Zala M, Anderson NP, Flowers MD, McDonald BA, et al.  
627 Emergence and early evolution of fungicide resistance in North American populations of  
628 *Zymoseptoria tritici*. *Plant Pathol* 2015;64:961–71.
- 629 [8] Hayes LE, Sackett KE, Anderson NP, Flowers MD, Mundt CC. Evidence of selection for  
630 fungicide resistance in *Zymoseptoria tritici* populations on wheat in western Oregon.  
631 *Plant Dis* 2016;100:483–9.
- 632 [9] Cowger C, Hoffer M, Mundt C. Specific adaptation by *Mycosphaerella graminicola* to a  
633 resistant wheat cultivar. *Plant Pathol* 2000;49:445–51.
- 634 [10] Berendsen RL, Vismans G, Yu K, Song Y, Jonge R, Burgman WP, et al. Disease-  
635 induced assemblage of a plant-beneficial bacterial consortium. *ISME J* 2018;12:1496.
- 636 [11] Toju H, Peay KG, Yamamichi M, Narisawa K, Hiruma K, Naito K, et al. Core  
637 microbiomes for sustainable agroecosystems. *Nat Plants* 2018;4:247–57.
- 638 [12] Cho I, Blaser MJ. The Human Microbiome: at the interface of health and disease. *Nat*  
639 *Rev Genet* 2012;13:260–70.

- 640 [13] Jakuschkin B, Fievet V, Schwaller L, Fort T, Robin C, Vacher C. Deciphering the  
641 Pathobiome: Intra- and interkingdom interactions involving the pathogen *Erysiphe*  
642 *alphitoides*. *Microb Ecol* 2016;72:870–80.
- 643 [14] Lebreton L, Guillerm-Erckelboudt A-Y, Gazengel K, Linglin J, Ourry M, Glory P, et  
644 al. Temporal dynamics of bacterial and fungal communities during the infection of  
645 *Brassica rapa* roots by the protist *Plasmodiophora brassicae*. *PloS One*  
646 2019;14:e0204195.
- 647 [15] Vayssier-Taussat M, Albina E, Citti C, Cosson J-F, Jacques M-A, Lebrun M-H, et al.  
648 Shifting the paradigm from pathogens to pathobiome: new concepts in the light of meta-  
649 omics. *Front Cell Infect Microbiol* 2014;4.
- 650 [16] Kerdraon L, Balesdent M-H, Barret M, Laval V, Suffert F. Crop residues in wheat-  
651 oilseed rape rotation system: a pivotal, shifting platform for microbial meetings. *Microb*  
652 *Ecol* 2019, in press.
- 653 [17] Cobo-Díaz JF, Baroncelli R, Le Floch G, Picot A. Combined metabarcoding and co-  
654 occurrence network analysis to profile the bacterial, fungal and *Fusarium* communities  
655 and their interactions in maize stalks. *Front Microbiol* 2019;10:261.
- 656 [18] Hadas A, Kautsky L, Goek M, Erman Kara E. Rates of decomposition of plant  
657 residues and available nitrogen in soil, related to residue composition through simulation  
658 of carbon and nitrogen turnover. *Soil Biol Biochem* 2004;36:255–66.
- 659 [19] Pascault N, Ranjard L, Kaisermann A, Bachar D, Christen R, Terrat S, et al.  
660 Stimulation of different functional groups of bacteria by various plant residues as a driver  
661 of soil priming effect. *Ecosystems* 2013;16:810–22.
- 662 [20] Pascault N, Cécillon L, Mathieu O, Hénault C, Sarr A, Lévêque J, et al. In situ  
663 dynamics of microbial communities during decomposition of wheat, rape, and alfalfa  
664 residues. *Microb Ecol* 2010;60:816–28.

- 665 [21] Kerdraon L, Laval V, Suffert F. Characterization of residue-microbiome-pathogen  
666 interactions in field-crop systems applied to the management of epidemics caused by  
667 residue-borne fungal diseases. arXiv 2019; doi:arXiv:1903.02246.
- 668 [22] Nicolardot B, Bouziri L, Bastian F, Ranjard L. A microcosm experiment to evaluate  
669 the influence of location and quality of plant residues on residue decomposition and  
670 genetic structure of soil microbial communities. *Soil Biol Biochem* 2007;39:1631–44.
- 671 [23] Dugan FM, Lupien SL, Hernandez-Bello M, Peever TL, Chen W. Fungi resident in  
672 chickpea debris and their suppression of growth and reproduction of *Didymella rabiei*  
673 under laboratory conditions. *J Phytopathol* 2005;153:431–439.
- 674 [24] Fernandez MR. The effect of *Trichoderma harzianum* on fungal pathogens infesting  
675 wheat and black oat straw. *Soil Biol Biochem* 1992;24:1031–4.
- 676 [25] Inch S, Gilbert J. Effect of *Trichoderma harzianum* on perithecial production of  
677 *Gibberella zeae* on wheat straw. *Biocontrol Sci Technol* 2007;17:635–46.
- 678 [26] Bujold I, Paulitz TC, Carisse O. Effect of *Microsphaeropsis* sp. on the production of  
679 perithecia and ascospores of *Gibberella zeae*. *Plant Dis* 2001;85:977–84.
- 680 [27] Palazzini JM, Groenenboom-de Haas B, Torres AM, Köhl J, Chulze SN. Biocontrol  
681 and population dynamics of *Fusarium spp.* on wheat stubble in Argentina. *Plant Pathol*  
682 2013;62:859–66.
- 683 [28] Schöneberg A, Musa T, Voegelé R, Vogelgsang S. The potential of antagonistic fungi  
684 for control of *Fusarium graminearum* and *Fusarium crookwellense* varies depending on  
685 the experimental approach. *J Appl Microbiol* 2015;118:1165–79.
- 686 [29] Palazzini JM, Yerkovich N, Alberione E, Chiotta M, Chulze SN. An integrated dual  
687 strategy to control *Fusarium graminearum* sensu stricto by the biocontrol agent  
688 *Streptomyces sp.* RC 87B under field conditions. *Plant Gene* 2017;9:13–18.

- 689 [30] Legrand F, Picot A, Cobo-Díaz JF, Chen W, Le Floch G. Challenges facing the  
690 biological control strategies for the management of Fusarium Head Blight of cereals  
691 caused by *F. graminearum*. Biol Control 2017;113:26–38.
- 692 [31] Perez C, Dill-Macky R, Kinkel LL. Management of soil microbial communities to  
693 enhance populations of *Fusarium graminearum*-antagonists in soil. Plant Soil  
694 2008;302:53–69.
- 695 [32] Kildea S, Ransbotyn V, Khan MR, Fagan B, Leonard G, Mullins E, et al. *Bacillus*  
696 *megaterium* shows potential for the biocontrol of Septoria tritici blotch of wheat. Biol  
697 Control 2008;47:37–45.
- 698 [33] Levy E, Eyal Z, Chet I. Suppression of Septoria tritici blotch and leaf rust on wheat  
699 seedling leaves by *pseudomonads*. Plant Pathol 1988;37:551–7.
- 700 [34] Perelló A, Simón MR, Arambarri AM, Cordo CA. Greenhouse screening of the  
701 saprophytic resident microflora for control of leaf spots of wheat (*Triticum aestivum*).  
702 Phytoparasitica 2001;29:341–351.
- 703 [35] Stocco MC, Mónaco CI, Abramoff C, Lampugnani G, Salerno G, Kripelz N, et al.  
704 Selection and characterization of Argentine isolates of *Trichoderma harzianum* for  
705 effective biocontrol of Septoria leaf blotch of wheat. World J Microbiol Biotechnol  
706 2016;32.
- 707 [36] Cordo CA, Monaco CI, Segarra CI, Simon MR, Mansilla AY, Perelló AE, et al.  
708 *Trichoderma* spp. as elicitors of wheat plant defense responses against *Septoria tritici*.  
709 Biocontrol Sci Technol 2007;17:687–98.
- 710 [37] Morais D, Sache I, Suffert F, Laval V. Is the onset of septoria tritici blotch epidemics  
711 related to the local pool of ascospores? Plant Pathol 2016;65:250–60.
- 712 [38] Newton A, Gravouil C, Fountaine J. Managing the ecology of foliar pathogens:  
713 ecological tolerance in crops. Ann Appl Biol 2010;157:343–59.

- 714 [39] Hartmann A, Schmid M, Tuinen D van, Berg G. Plant-driven selection of microbes.  
715 Plant Soil 2009;321:235–57.
- 716 [40] Pusztahelyi T, Holb IJ, Pócsi I. Secondary metabolites in fungus-plant interactions.  
717 Front Plant Sci 2015;6:573.
- 718 [41] Allison SD, Martiny JBH. Resistance, resilience, and redundancy in microbial  
719 communities. Proc Natl Acad Sci 2008;105:11512–9.
- 720 [42] Shetty NP, Mehrabi R, Lütken H, Haldrup A, Kema GH, Collinge DB, et al. Role of  
721 hydrogen peroxide during the interaction between the hemibiotrophic fungal pathogen  
722 *Septoria tritici* and wheat. New Phytol 2007;174:637–47.
- 723 [43] Thordal-Christensen H, Zhang Z, Wei Y, Collinge DB. Subcellular localization of  
724 H<sub>2</sub>O<sub>2</sub> in plants. H<sub>2</sub>O<sub>2</sub> accumulation in papillae and hypersensitive response during the  
725 barley—powdery mildew interaction. Plant J 1997;11:1187–94.
- 726 [44] Trujillo M, Kogel K-H, Hüchelhoven R. Superoxide and hydrogen peroxide play  
727 different roles in the nonhost interaction of barley and wheat with inappropriate formae  
728 speciales of *Blumeria graminis*. Mol Plant Microbe Interact 2004;17:304–12.
- 729 [45] Orton ES, Brown JK. Reduction of growth and reproduction of the biotrophic fungus  
730 *Blumeria graminis* in the presence of a necrotrophic pathogen. Front Plant Sci  
731 2016;7:742.
- 732 [46] Grudzinska-Sterno M, Yuen J, Stenlid J, Djurle A. Fungal communities in organically  
733 grown winter wheat affected by plant organ and development stage. Eur J Plant Pathol  
734 2016;146:401–17.
- 735 [47] Perelló AE, Moreno MV, Mónaco C, Simón MR, Cordo C. Biological control of  
736 *Septoria tritici* blotch on wheat by *Trichoderma spp.* under field conditions in Argentina.  
737 BioControl 2009;54:113–22.

- 738 [48] Nelson EB. Microbial dynamics and interactions in the spermosphere. *Annu Rev*  
739 *Phytopathol* 2004;42:271–309.
- 740 [49] Saleem M, Meckes N, Pervaiz ZH, Traw MB. Microbial interactions in the  
741 phyllosphere increase plant performance under herbivore biotic stress. *Front Microbiol*  
742 2017;8:41.
- 743 [50] Whipps JM. Microbial interactions and biocontrol in the rhizosphere. *J Exp Bot*  
744 2001;52:487–511.
- 745 [51] Haugaard H, Lyngs Jørgensen H, Lyngkjær M, Smedegaard-Petersen V, Collinge DB.  
746 Control of *Blumeria graminis f. sp. hordei* by treatment with mycelial extracts from  
747 cultured fungi. *Plant Pathol* 2001;50:552–60.
- 748 [52] Weber G, Gülec S, Kranz J. Interactions between *Erysiphe graminis* and *Septoria*  
749 *nodorum* on wheat. *Plant Pathol* 1994;43:158–63.
- 750 [53] Dal Bello G, Monaco C, Simon M. Biological control of seedling blight of wheat  
751 caused by *Fusarium graminearum* with beneficial rhizosphere microorganisms. *World J*  
752 *Microbiol Biotechnol* 2002;18:627–36.
- 753 [54] Wicklow DT, Poling SM. Antimicrobial activity of pyrrocidines from *Acremonium*  
754 *zeae* against endophytes and pathogens of maize. *Phytopathology* 2009;99:109–15.
- 755 [55] Dewey F, Wong YL, Seery R, Hollins T, Gurr S. Bacteria associated with  
756 *Stagonospora (Septoria) nodorum* increase pathogenicity of the fungus. *New Phytol*  
757 1999;144:489–97.
- 758 [56] Poudel R, Jumpponen A, Schlatter D, Paulitz T, Gardener BM, Kinkel LL, et al.  
759 Microbiome networks: a systems framework for identifying candidate microbial  
760 assemblages for disease management. *Phytopathology* 2016;106:1083–96.

- 761 [57] Luongo L, Galli M, Corazza L, Meekes E, Haas LD, Van Der Plas CL, et al. Potential  
762 of fungal antagonists for biocontrol of *Fusarium spp.* in wheat and maize through  
763 competition in crop debris. *Biocontrol Sci Technol* 2005;15:229–42.
- 764 [58] Ritpitakphong U, Falquet L, Vimoltust A, Berger A, Métraux J-P, L'Haridon F. The  
765 microbiome of the leaf surface of *Arabidopsis* protects against a fungal pathogen. *New*  
766 *Phytol* 2016;210:1033–43.
- 767 [59] Weller DM, Raaijmakers JM, Gardener BBM, Thomashow LS. Microbial populations  
768 responsible for specific soil suppressiveness to plant pathogens. *Annu Rev Phytopathol*  
769 2002;40:309–48.
- 770 [60] Schlatter D, Kinkel L, Thomashow L, Weller D, Paulitz T. Disease suppressive soils:  
771 new insights from the soil microbiome. *Phytopathology* 2017;107:1284–97.
- 772 [61] Berg G, Rybakova D, Grube M, Köberl M. The plant microbiome explored:  
773 implications for experimental botany. *J Exp Bot* 2015;67:995–1002.
- 774 [62] Ellis JG. Can plant microbiome studies lead to effective biocontrol of plant diseases?  
775 *Mol Plant Microbe Interact* 2017;30:190–3.
- 776 [63] Berendsen RL, Pieterse CM, Bakker PA. The rhizosphere microbiome and plant  
777 health. *Trends Plant Sci* 2012;17:478–486.
- 778 [64] Suffert F, Sache I, Lannou C. Assessment of quantitative traits of aggressiveness in  
779 *Mycosphaerella graminicola* on adult wheat plants. *Plant Pathol* 2013;62:1330–41.
- 780 [65] Waalwijk C, Mendes O, Verstappen EC, de Waard MA, Kema GH. Isolation and  
781 characterization of the mating-type idiomorphs from the wheat septoria leaf blotch fungus  
782 *Mycosphaerella graminicola*. *Fungal Genet Biol* 2002;35:277–86.
- 783 [66] Buée M, Reich M, Murat C, Morin E, Nilsson RH, Uroz S, et al. 454 Pyrosequencing  
784 analyses of forest soils reveal an unexpectedly high fungal diversity: Research. *New*  
785 *Phytol* 2009;184:449–56.



- 786 [67] Caporaso JG, Lauber CL, Walters WA, Berg-Lyons D, Lozupone CA, Turnbaugh PJ,  
787 et al. Global patterns of 16S rRNA diversity at a depth of millions of sequences per  
788 sample. *Proc Natl Acad Sci* 2011;108:4516–22.
- 789 [68] Martin M. Cutadapt removes adapter sequences from high-throughput sequencing  
790 reads. *EMBnet Journal* 2011;17:10–2.
- 791 [69] Callahan BJ, McMurdie PJ, Rosen MJ, Han AW, Johnson AJA, Holmes SP. DADA2:  
792 High-resolution sample inference from Illumina amplicon data. *Nat Methods*  
793 2016;13:581–3.
- 794 [70] Callahan B. DADA2 pipeline tutorial (1.8).  
795 <https://benjjneb.github.io/dada2/tutorial.html> (accessed March 20, 2019).
- 796 [71] Cole JR, Wang Q, Cardenas E, Fish J, Chai B, Farris RJ, et al. The Ribosomal  
797 Database Project: improved alignments and new tools for rRNA analysis. *Nucleic Acids*  
798 *Res* 2009;37:D141–5.
- 799 [72] Abarenkov K, Nilsson RH, Larsson K-H, Alexander IJ, Eberhardt U, Erland S, et al.  
800 The UNITE database for molecular identification of fungi – recent updates and future  
801 perspectives. *New Phytol* 2010;186:281–5.
- 802 [73] McMurdie PJ, Holmes S. phyloseq: An R package for reproducible interactive  
803 analysis and graphics of microbiome census data. *PLoS ONE* 2013;8:e61217.
- 804 [74] Paradis E, Schliep K. ape 5.0: an environment for modern phylogenetics and  
805 evolutionary analyses in R. *Bioinformatics* 2019; 35:526–8.
- 806 [75] Oksanen J, Blanchet FG, Friendly M, Kindt R, Legendre P, McGlenn D, et al. vegan:  
807 Community Ecology Package. R package version 2.5-4. [https://CRAN.R-](https://CRAN.R-project.org/package=vegan)  
808 [project.org/package=vegan](https://CRAN.R-project.org/package=vegan) (accessed March 20, 2019).
- 809 [76] Segata N, Izard J, Waldron L, Gevers D, Miropolsky L, Garrett WS, et al.  
810 Metagenomic biomarker discovery and explanation. *Genome Biol* 2011;12:R60.

- 811 [77] Kurtz ZD, Müller CL, Miraldi ER, Littman DR, Blaser MJ, Bonneau RA. Sparse and  
812 compositionally robust inference of microbial ecological networks. *PLOS Comput Biol*  
813 2015;11:e1004226.
- 814 [78] Tipton L, Müller CL, Kurtz ZD, Huang L, Kleerup E, Morris A, et al. Fungi stabilize  
815 connectivity in the lung and skin microbial ecosystems. *Microbiome* 2018;6:12.
- 816 [79] Csardi G, Nepusz T. The igraph software package for complex network research.  
817 <https://pdfs.semanticscholar.org/1d27/44b83519657f5f2610698a8ddd177ced4f5c.pdf>  
818 (accessed March 20, 2019).
- 819 [80] Shannon P, Markiel A, Ozier O, Baliga NS, Wang JT, Ramage D, et al. Cytoscape: a  
820 software environment for integrated models of biomolecular interaction networks.  
821 *Genome Res* 2003;13:2498–504.
- 822

823 **Figure and table captions**

824

825 **Figure 1.** Preparation of wheat residues.

826 (A) Adult wheat plants were inoculated with *Zymoseptoria tritici* under greenhouse  
827 conditions.

828 (B) Sealed nylon bags containing wheat residues, consisting of stem and leaf fragments of  
829 approximately 2 cm in length (red yarn for residues from wheat plants inoculated with *Z.*  
830 *tritici*; white yarn for those from non-inoculated plants).

831 (C) “Soil contact” treatment: nylon bags were left on the ground of the field and partially  
832 covered with soil (one of the 15 sampling points).

833 (D) “Above ground” treatment: plastic grids containing nylon bags placed outside the field.

834

835 **Figure 2.** Relative abundance of *Zymoseptoria tritici*. Each box represents the distribution of  
836 the relative abundances of genera for the 15 sampling points. Wilcoxon tests were performed  
837 for inoculation condition (NS: not significant; \*  $p$ -value<0.05; \*\*  $p$ -value <0.01; \*\*\*  $p$ -value  
838 <0.001).

839

840 **Figure 3.** Dissimilarities between microbial communities. Beta diversity analyses for fungal  
841 (A, B) and bacterial (C, D) communities originating from 420 wheat residue samples.  
842 Hierarchical clustering (A, C) and multidimensional scaling (B, D) are based on the  
843 compositional distances between samples (Bray Curtis distance matrix).

844 (A, C) Visualization of compositional distances between samples through hierarchical  
845 clustering with the average linkage method. The samples (15 sampling points per treatment)  
846 corresponding to the two cropping seasons (year) are represented by the two colored  
847 horizontal series (2016-2017, 2017-2018). Effects of seasonality are highlighted by different

848 colours, corresponding to the different sampling dates (July: green; October: red; December:  
849 blue; February: gray). The intensity of the colors distinguishes between samples obtained  
850 from plants inoculated with *Z. tritici* (I, dark hues) and non-inoculated samples (NI, light  
851 hues). “Above ground” and “soil contact” treatments are represented by horizontal lines, with  
852 each sample considered separately.

853 (B, D) Visualization of compositional distances between samples through multidimensional  
854 scaling (MDS). Each data point corresponds to one sample of wheat residues. The shape of  
855 the points (circles: 2016-2017; triangles: 2017-2018) corresponds to the cropping season (year  
856 effect); the colors, similar to those used in graphs A and C, correspond to the sampling dates  
857 (seasonality effect). For fungal communities, MDS analysis was performed on all samples  
858 together, whereas for bacterial communities, the analyses of the July samples and samples  
859 from all other sampling dates (October, December, and February) were separated, in  
860 accordance with the large differences between the communities of these samples shown in the  
861 clustering analysis (C). For a sake of clarity, the MDS are shown according to the soil contact  
862 condition.

863

864 **Figure 4.** Changes in the relative abundance of microbial taxa over time.

865 (A, C) Diversity and dominance of the 30 most abundant (30/107) fungal genera (A) and the  
866 50 most abundant (50/189) bacterial genera (B) distributed in all samples distinguishing  
867 between the different experimental conditions: i.e. cropping season (2016-2017; 2017-2018),  
868 contact with soil (“above ground” and “soil contact” treatments), seasonality (July: green;  
869 October: red; December: blue; February: gray), and inoculation with *Zymoseptoria tritici*  
870 (inoculated: dark hues; non-inoculated: light hues).

871 (B, D) Significant differences in relative abundance of fungal (B) and bacterial (D) genera  
872 between the samples in “soil contact” (red) and “above ground” (blue) samples in linear

873 discriminant analysis (LDA). The *Z. tritici* inoculation condition was used as a subclass to  
874 avoid interference in the LDA. Only genera with a  $p$ -value  $< 0.05$  for the Kruskal-Wallis test  
875 and an LDA score  $> 2$  are displayed.

876

877 **Figure 5.** Temporal dynamics of co-occurrence networks.

878 (A) Networks based on bacterial and fungal ASVs combined. In all networks, circles and  
879 squares correspond to bacterial and fungal ASVs, respectively, with colors representing class.  
880 Isolated nodes are not shown. Edges represent positive (green) or negative (red) interactions.  
881 The Venn diagram highlights the number of non-isolated nodes common and specific to  
882 “above ground” (AG) and “soil contact” (SC) treatments for each sampling date (October,  
883 December, February).

884 (B) Percentage of reads associated with fungal and bacterial classes for each network. Isolated  
885 nodes are included. Colors are the same as in (A). (C) Upset plot of bacterial and fungal non-  
886 isolated nodes common and specific to sampling date for each treatment.

887

888 **Figure 6.** Betweenness, centrality and degree of each ASV in the October networks. Nodes  
889 with high betweenness, centrality and high degree values are considered to be keystone taxa  
890 in the networks. The genera of the fungal and bacterial ASVs with the highest degree and  
891 centrality are shown: *Acrem(onium)*; *Clado(sporium)*; *Devos(ia)*; *Epico(ccum)*;  
892 *Fron(d)ihabitans*); *Myrme(cridium)*; *Neorh(izobium)*; *Pedob(acter)*; *Rhizo(bium)*;  
893 *SphiG(=Sphingomonas)*; *Strep(tomyces)*; *Uncl.(assified)*; *Zymos(eptoria)*. The betweenness,  
894 centrality and degree of each ASV in the networks for the other sampling dates (July,  
895 December, and February) are presented in **Supplementary Figure 5**.

896

897 **Figure 7.** Subnetworks based on the data in Figure 4A and composed of differential bacterial  
898 and fungal ASVs identified in residue samples (originating from wheat plants inoculated and  
899 non-inoculated with *Zymoseptoria tritici*) and of the first adjacent nodes. Node color  
900 corresponds to the results of LefSe differential analysis between inoculated (orange) and non-  
901 inoculated (blue) treatments. Only genera with  $p$ -values  $< 0.01$  for the Kruskal-Wallis tests  
902 and LDA scores  $> 2$  were retained for the plot. The first adjacent nodes of each differential  
903 ASV are not named, except for ASVs interacting with *Z. tritici*. Edges represent positive  
904 (green) or negative (red) interactions. Differential ASVs are plotted with genus name  
905 abbreviations: *Acido(vorax)*; *Acrem(onium)*; *Aerom(icrobium)*; *Alkal(ibacterium)*;  
906 *Alter(naria)*; *Aquab(acterium)*; *Arthr(obacter)*; *Blume(ria)*; *Botry(osporium)*;  
907 *Brach(ybacterium)*; *Brevi(bacterium)*; *Brevu(ndimonas)*; *Chaet(omium)*;  
908 *Chrys(eobacterium)*; *Clado(sporium)*; *Crypt(ococcus)*; *Curto(bacterium)*; *Desem(zia)*;  
909 *Devos(ia)*; *Epico(ccum)*; *Falsi(rhodobacter)*; *Flavo(bacterium)*; *Fron(d)ihabitans*;  
910 *Fusar(ium)*; *Gibel(lulopsis)*; *Halom(onas)*; *Massi(lia)*; *MethB(=Methylobacterium)*;  
911 *MethP(=Methylophilus)*; *Monog(raphella)*; *Neorh(izobium)*; *Neose(tophoma)*;  
912 *Nocar(dioides)*; *Novih(erbaspirillum)*; *Panto(ea)*; *Parac(occus)*; *Param(icrothyrium)*;  
913 *Pedob(acter)*; *Penic(illium)*; *Phaeo(sphaeria)*; *PhaeP(sphaeriopsis)*; *Plano(coccus)*;  
914 *PlanM(=Planomicrobium)*; *Pseud(omonas)*; *PseuP(=Pseudopithomyces)*; *Rhizo(bium)*;  
915 *Rhoda(nobacter)*; *Salin(irepens)*; *Sangu(ibacter)*; *Saroc(ladium)*; *SphiB(=Sphingobium)*;  
916 *SphiG(=Sphingomonas)*; *Stago(nospora)*; *Steno(trophomonas)*; *Symme(trospora)*;  
917 *Terri(bacillus)*; *Torul(a)*; *Trich(oderma)*; *Uncl.(assified)*; *Vario(vorax)*; *Zymos(eptoria)*.

918

919 **Table 1.** Results of PERMANOVAs analyzing the effects of cropping season, sampling date,  
920 contact with soil and inoculation on fungal and bacterial communities. Factors were tested

921 with the `adonis2` function of the `vegan` package. PERMANOVAs were performed with all

922 tested factors together, with the “margin” option.

923

924 **Additional files**

925

926 **Supplementary Table 1.** Sequence filtering for each run.

927

928 **Supplementary Table 2.** Analysis of the proportion of intra-kingdom interactions (between  
929 two fungal ASVs and between two bacterial ASVs) and inter-kingdom interactions (between  
930 a fungal ASV and a bacterial ASV) in the ecological networks. The statistical significance of  
931 the under- or over-representation of inter-kingdom interactions (when F-B residuals  $< 1$  or  $>$   
932  $1$ , respectively) was established by a  $\chi^2$  test of independence performed on the contingency  
933 table ( $\chi^2 < 0.001$ ).

934

935 **Supplementary Table 3.** Number of ASVs detected for each analysis performed on the  
936 dataset and properties of residue microbial ecological networks.

937

938 **Supplementary Figure 1.** Alpha diversity of microbial communities associated with  
939 residues. Observed richness (number of ASVs) and diversity (Shannon index), in four sets of  
940 experimental conditions (cropping season, contact with soil, seasonality, *Zymoseptoria tritici*  
941 inoculation). Each box represents the distribution of the number of ASVs and Shannon index  
942 for 15 sampling points per treatment. Wilcoxon tests were performed for inoculation  
943 condition (inoculated, non-inoculated) and sampling date (July, October, December,  
944 February; NS: not significant; \*  $p$ -value  $< 0.05$ ; \*\*  $p$ -value  $< 0.01$ ; \*\*\*  $p$ -value  $< 0.001$ ).

945

946 **Supplementary Figure 2.** Seasonal shift, from October to February, in the relative abundance  
947 of a selection of bacterial (A) and fungal (B) classes present on wheat residues (originating  
948 from wheat plants inoculated and not inoculated with *Zymoseptoria tritici*) according to  
949 cropping season (2016-2017, 2017-2018) and soil contact condition (in contact with the soil



950 or above ground). Each box represents the distribution of class relative abundances for the 15  
951 sampling points per treatment. Wilcoxon tests were performed for soil contact condition (NS:  
952 not significant; \*  $p$ -value < 0.05; \*\*  $p$ -value < 0.01; \*\*\*  $p$ -value < 0.001).

953

954 **Supplementary Figure 3.** Significant differences in the dominance of fungal and bacterial  
955 genera between wheat residues originating from inoculated (orange) and non-inoculated  
956 (blue) wheat plants in linear discriminant analyses (LDA), according to three sets of  
957 experimental conditions (cropping season, soil contact, seasonality). Only ASVs with  $p$ -  
958 values < 0.01 for the Kruskal-Wallis test and LDA scores > 2 are displayed.

959

960 **Supplementary Figure 4.** Residue microbial ecological networks based on bacterial and  
961 fungal ASVs combined for July (no contact with soil) for each cropping season (2016-2017,  
962 2017-2018). Circles and squares correspond to bacterial and fungal ASVs, respectively, with  
963 colors represent classes. Isolated nodes are not shown. Edges represent positive (green) or  
964 negative (red) interactions.

965

966 **Supplementary Figure 5.** Betweenness, centrality and degree of each ASV in the networks.  
967 Nodes with high betweenness, centrality and high degree values are considered to be keystone  
968 taxa in the networks. The genera of the fungal and bacterial ASVs with the highest degree and  
969 centrality are indicated: *Acrem(onium)*; *Actin(oplanes)*; *Aquab(acterium)*; *Artic(ulospora)*;  
970 *Brevi(bacterium)*; *Clado(sporium)*; *Devos(ia)*; *Epico(ccum)*; *Fron(d)ihabitans*; *Massi(lia)*;  
971 *Mesor(hizobium)*; *MethP(=Methylophilus)*; *Myrme(cridium)*; *Neorh(izobium)*;  
972 *Nocar(dioides)*; *Pedob(acter)*; *Phaeo(sphaeria)*; *PlanM(=Planomicrobium)*;  
973 *Promi(cromonospora)*; *Pteru(la)*; *Rhizo(bium)*; *Schiz(othecium)*; *SphiG(=Sphingomonas)*;  
974 *SphiP(=Sphingopyxis)*; *Strep(tomyces)*; *Torul(a)*; *Uncl.(assified)*; *Zymos(eptoria)*.

975

976 **Supplementary Figure 6.** Mocks analysis for the two fungal sequencing runs (A, C) and the  
977 two bacterial sequencing runs (D, F).

978 (A, D) Composition of the mocks. All microbial DNAs were pooled at equimolar  
979 concentrations.

980 (B, E) Filter on the relative abundance of ASVs. The library size was normalized by  
981 proportion before analysis. The red line corresponds to a threshold at 3 % of the size of the  
982 library.

983 (C, F) ASVs detected in each mock. The 40 most abundant fungal ASVs are indicated (C),  
984 whereas all bacterial ASVs are indicated (F). The name of the ASVs corresponds to the  
985 taxonomic affiliation to the genus. All genera present in fungal mocks were detected  
986 (*Gibberella* and *Fusarium* are synonymous), while some bacterial genera were not detected in  
987 bacterial mocks, which differed only from one ASV. The red line corresponds to a threshold  
988 at 3 % of the size of the library.

**Table 1** - Results of the PERMANOVAs analyzing the effects of cropping season, sampling date, contact with soil and inoculation on fungal and bacterial assemblages. Factors were tested with the adonis2 function of the vegan package. PERMANOVAs were performed with all tested factors together, with the “margin” option

|          |                    | Factors tested    | Proportion of the variance explained | <i>p</i> -value |
|----------|--------------------|-------------------|--------------------------------------|-----------------|
| Fungi    | July               | Season            | 0.197                                | 0.001           |
|          |                    | Inoculation       | 0.333                                | 0.001           |
|          | Oct. - Dec. - Feb. | Season            | 0.217                                | 0.001           |
|          |                    | Sampling date     | 0.136                                | 0.001           |
|          |                    | Contact with soil | 0.096                                | 0.001           |
|          |                    | Inoculation       | 0.012                                | 0.001           |
| Bacteria | July               | Season            | 0.192                                | 0.001           |
|          |                    | Inoculation       | 0.051                                | 0.004           |
|          | Oct. - Dec. - Feb. | Season            | 0.128                                | 0.001           |
|          |                    | Sampling date     | 0.168                                | 0.001           |
|          |                    | Contact with soil | 0.195                                | 0.001           |
|          |                    | Inoculation       | 0.006                                | 0.001           |

**Figure 1**

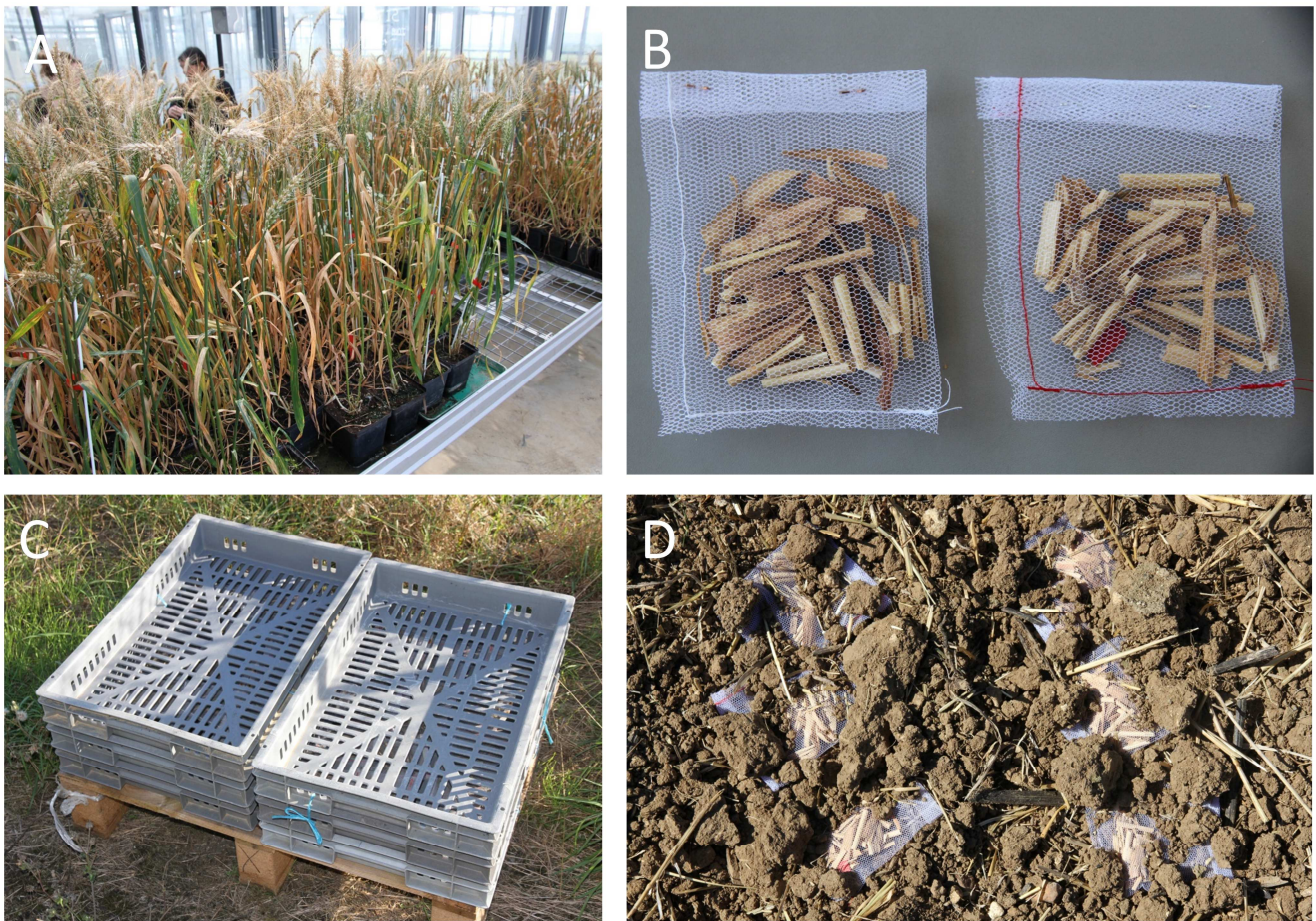

Figure 2

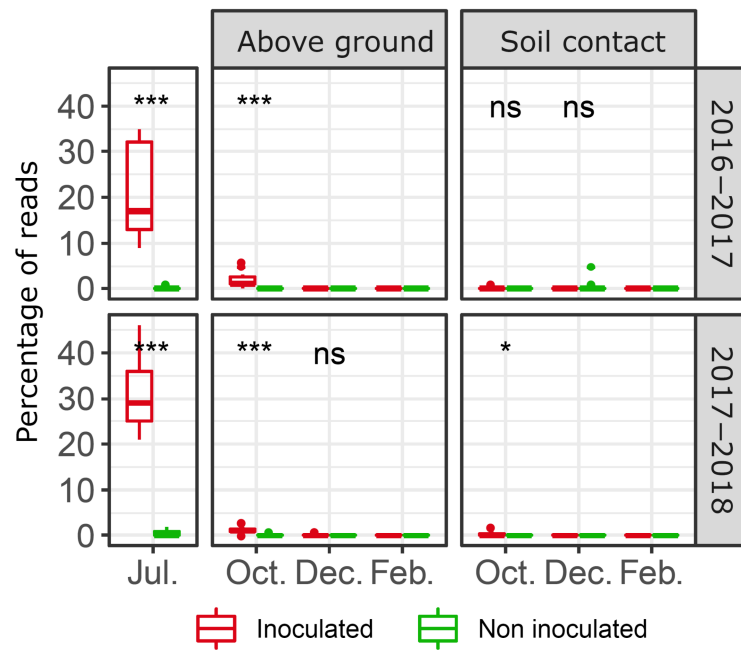

**Figure 3**

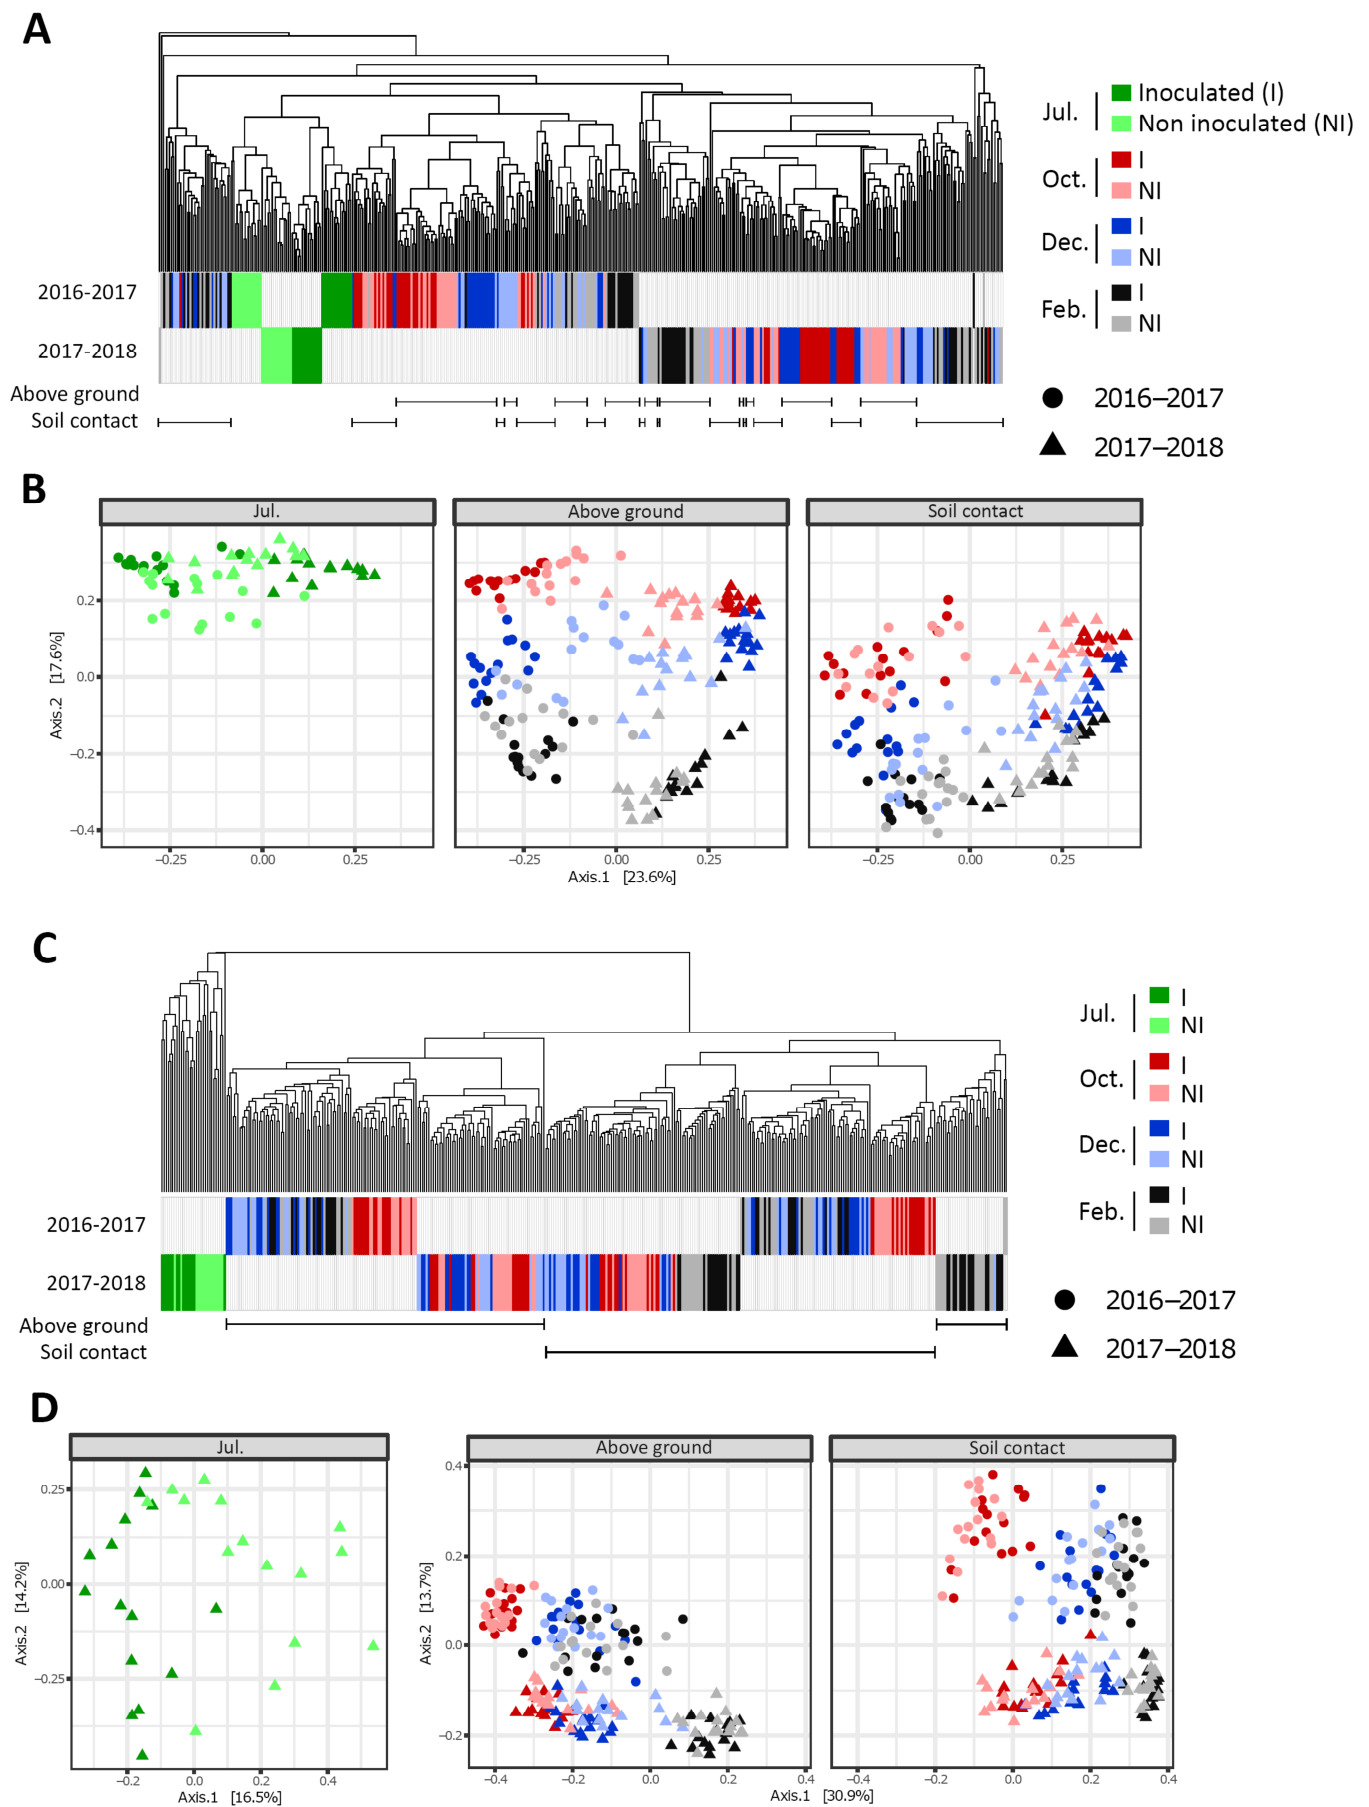

**Figure 4**

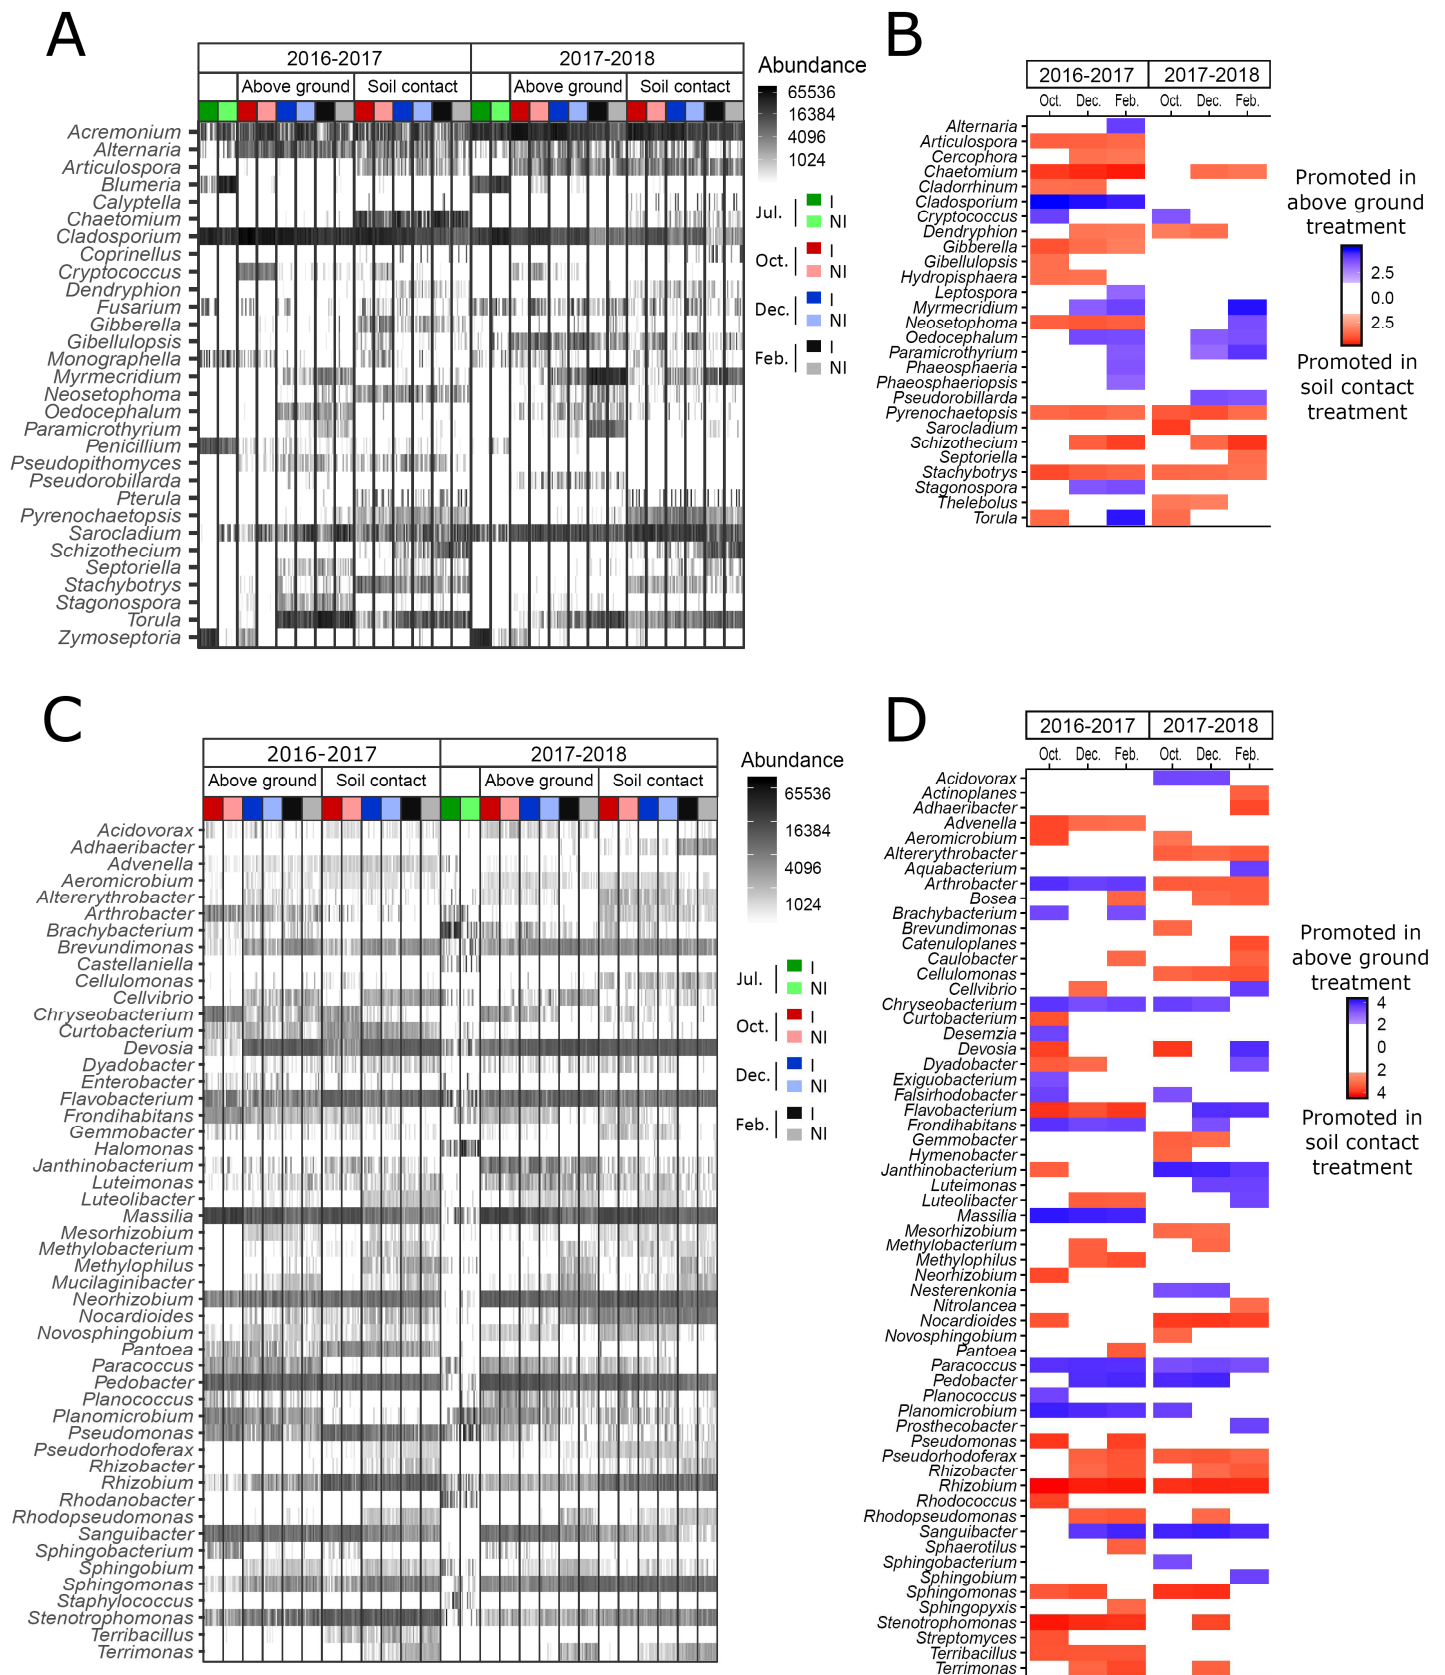

**Figure 5**

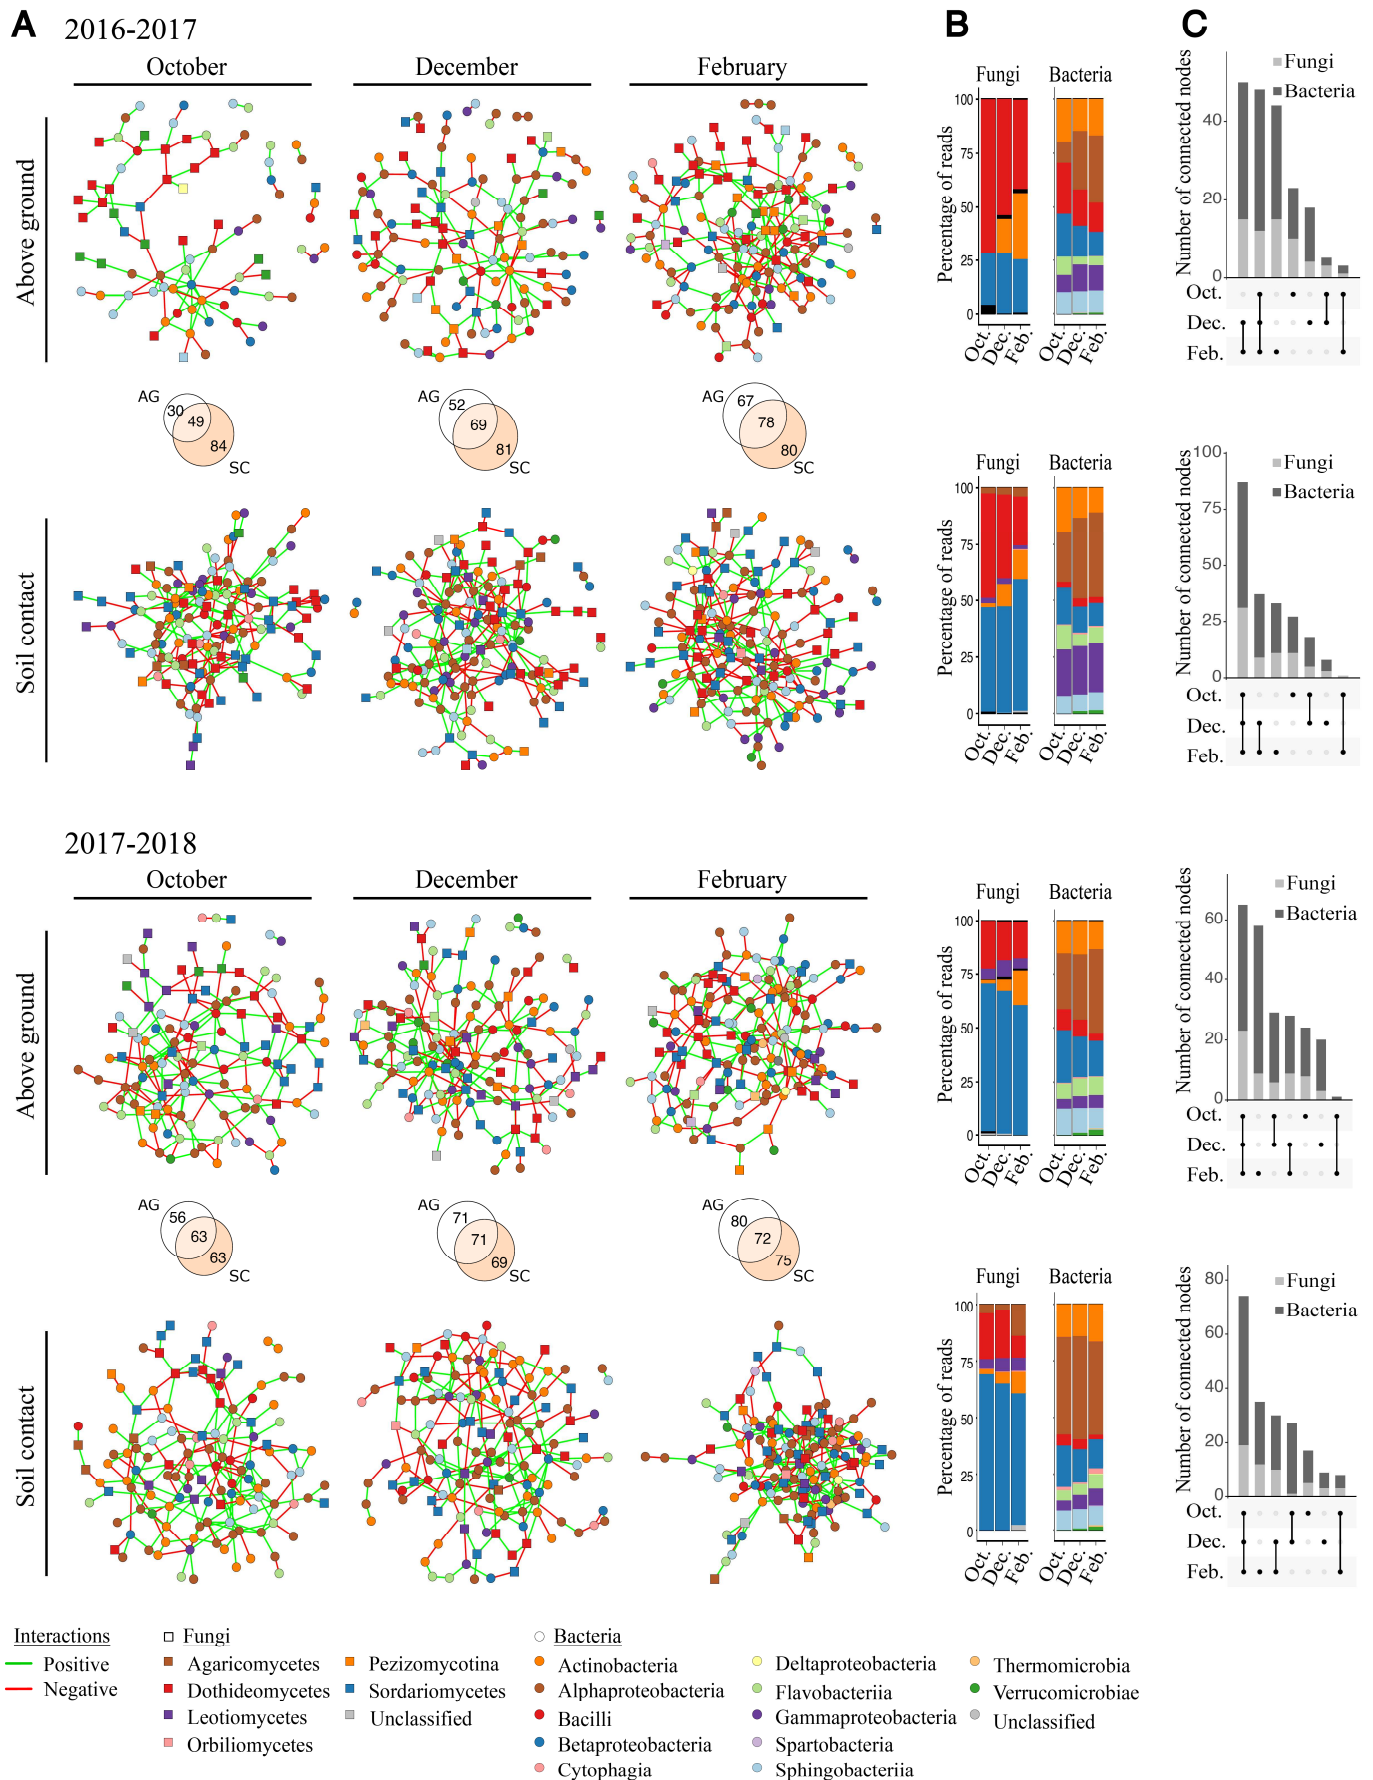



**Figure 6**

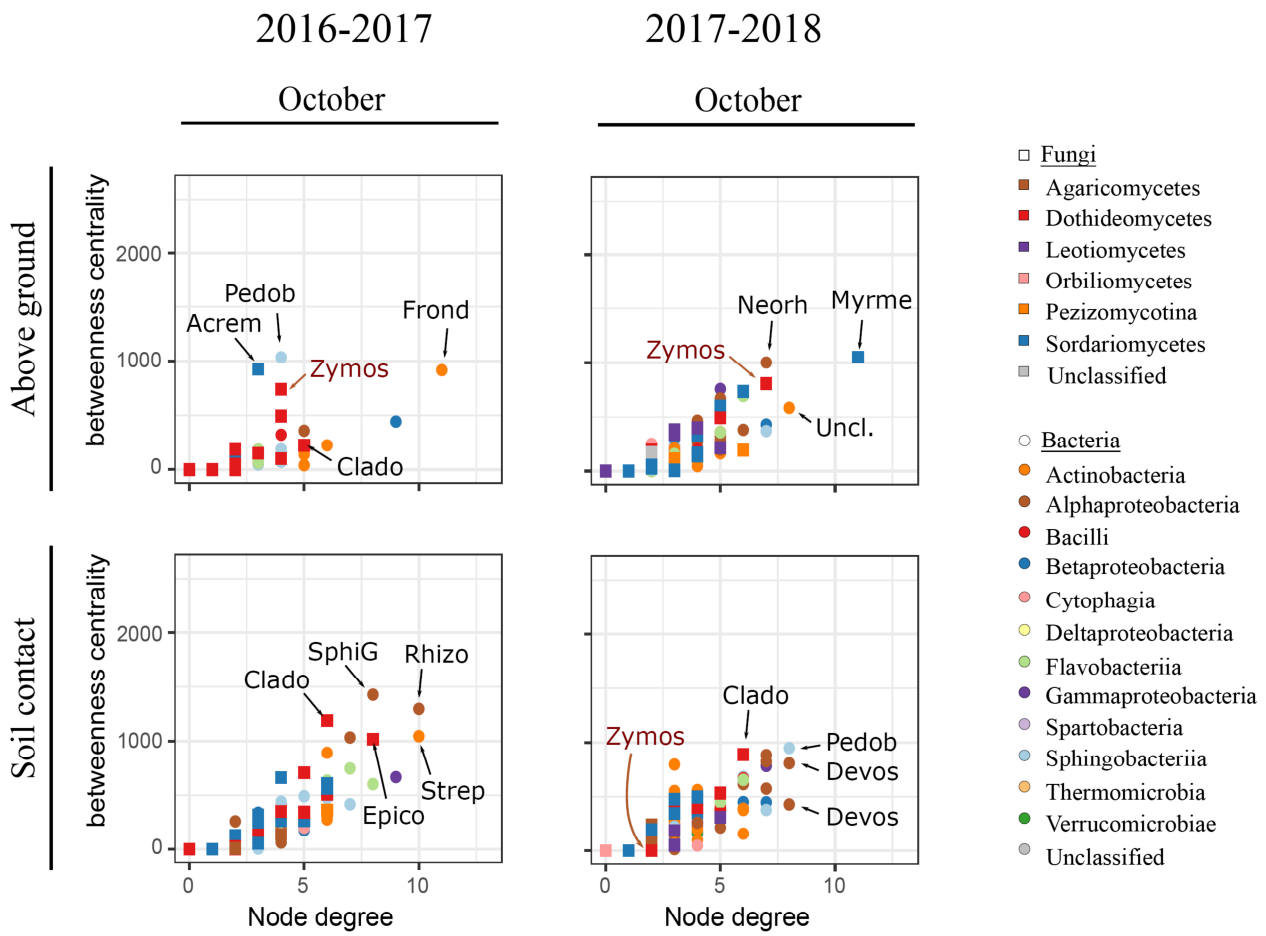

**Figure 7**

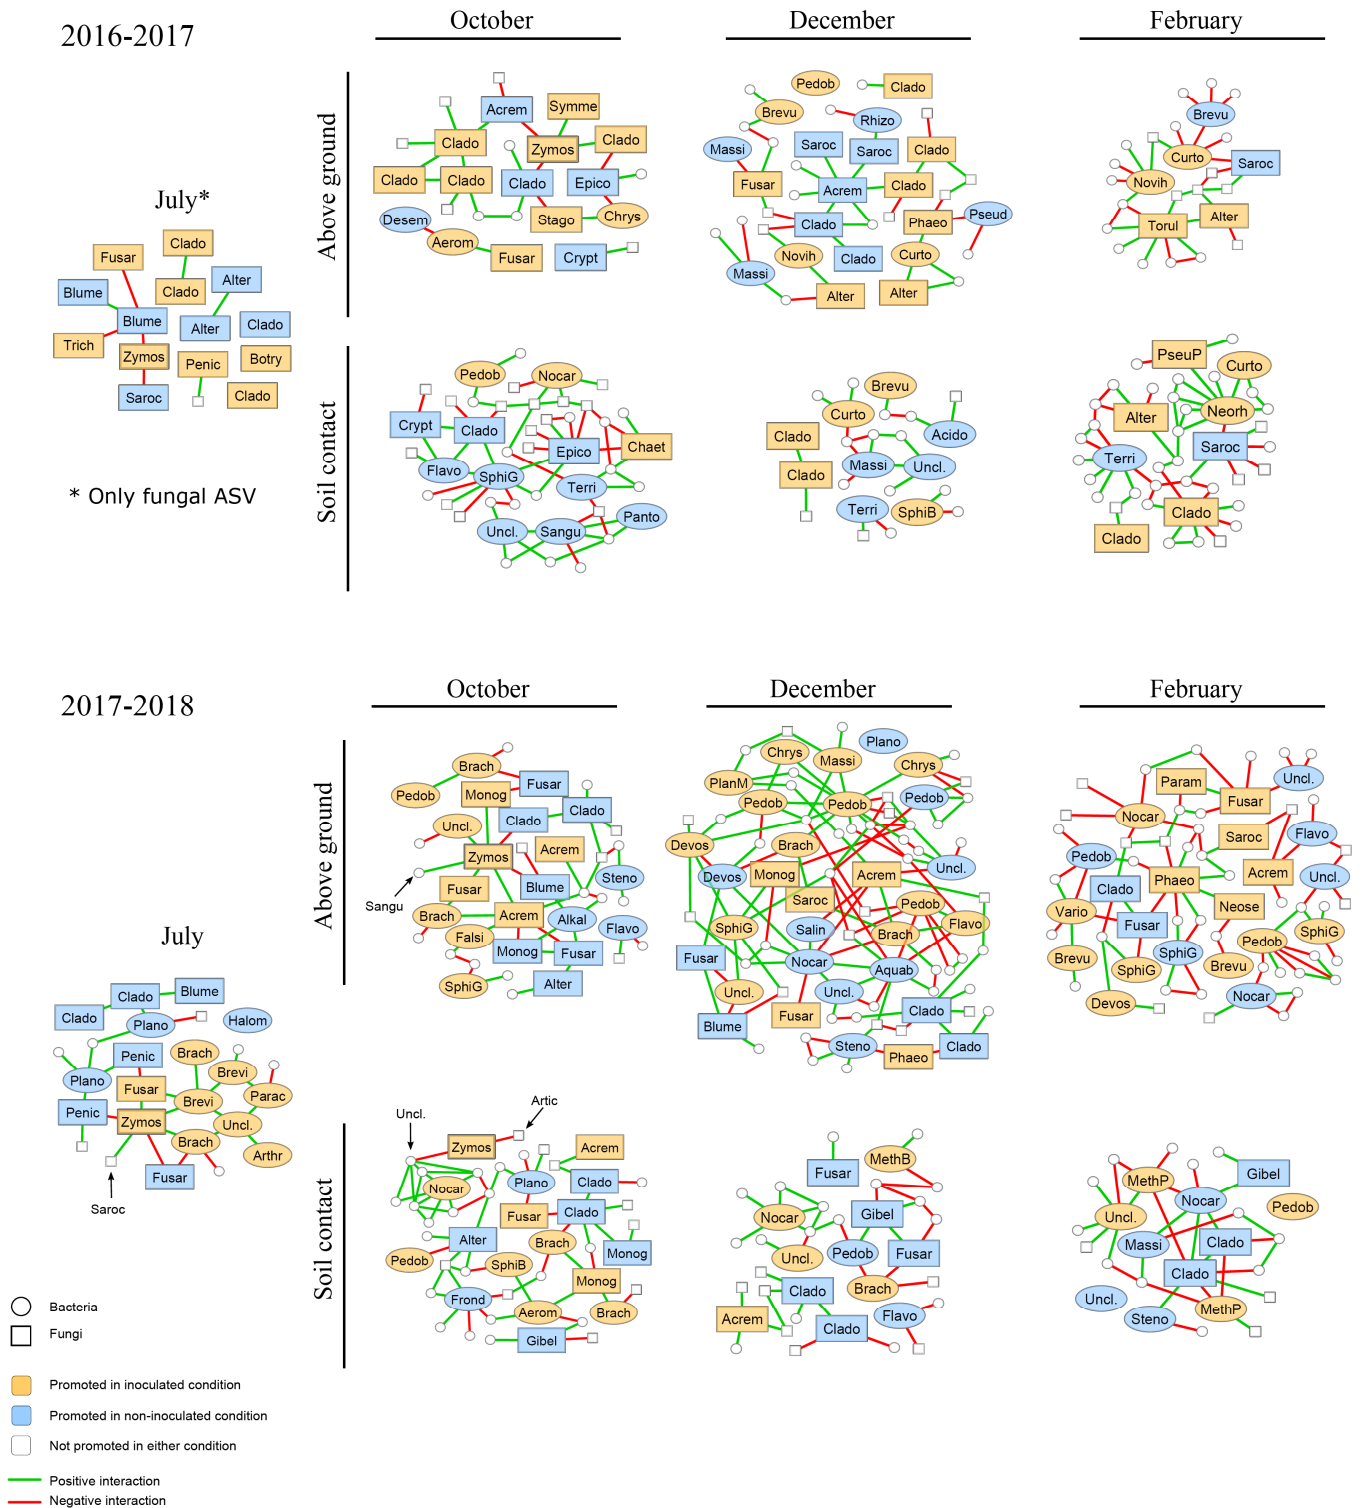

### Supplementary Table 1 - Sequence filtering for each run

| Run | Primers      | Sequence number (paired end) | Sequence quality trimming (F/R) | Selection by sequence length | Quality sequence number after DADA2 analysis |
|-----|--------------|------------------------------|---------------------------------|------------------------------|----------------------------------------------|
| #1  | ITS1F / ITS2 | 10 536 086 (×2)              | 220 / 210                       | -                            | 7 164 826                                    |
| #2  | 515f / 806r  | 8 368 872 (×2)               | 230 / 200                       | 253 bp                       | 5 562 335                                    |
| #3  | ITS1F / ITS2 | 10 216 508 (×2)              | 220 / 190                       | -                            | 6 965 664                                    |
| #4  | 515f / 806r  | 9 975 344 (×2)               | 220 / 170                       | 253 bp                       | 5 734 825                                    |

**Supplementary Table 2** - Analysis of the proportion of intra-kingdom interactions (between two fungal ASVs and between two bacterial ASVs) and inter-kingdom interactions (between a fungal ASV and a bacterial ASV) in the ecological networks. The statistical significance of the under- or over-representation of inter-kingdom interactions (when F-B residuals < 1 or > 1, respectively) was established by a  $\chi^2$  test of independence performed on the contingency table ( $\chi^2 < 0.001$ ).

| Networks <sup>1</sup>             | Number of species |                | Number of interactions |     |     | Theoretical maximum number of interactions |                  |                  | Residuals |        |        |
|-----------------------------------|-------------------|----------------|------------------------|-----|-----|--------------------------------------------|------------------|------------------|-----------|--------|--------|
|                                   | F <sup>2</sup>    | B <sup>3</sup> | F-F                    | B-B | F-B | F-F <sup>4</sup>                           | B-B <sup>5</sup> | F-B <sup>6</sup> | F-F       | B-B    | F-B    |
| Oct. 2016-2017, above ground      | 32                | 73             | 17                     | 57  | 17  | 496                                        | 2628             | 2336             | 1.856     | 0.545  | -1.939 |
| Oct. 2016-2017, contact with soil | 52                | 90             | 32                     | 121 | 69  | 1326                                       | 4005             | 4680             | 1.060     | -0.736 | 0.358  |
| Dec. 2016-2017, above ground      | 39                | 100            | 19                     | 86  | 42  | 741                                        | 4950             | 3900             | 0.340     | 0.036  | -0.266 |
| Dec. 2016-2017, contact with soil | 51                | 105            | 25                     | 145 | 74  | 1275                                       | 5460             | 5355             | -0.772    | 0.236  | 0.160  |
| Feb. 2016-2017, above ground      | 48                | 107            | 30                     | 110 | 65  | 1128                                       | 5671             | 5136             | 1.109     | -0.866 | 0.508  |
| Feb. 2016-2017, contact with soil | 55                | 110            | 32                     | 136 | 90  | 1485                                       | 5995             | 6050             | 0.208     | -1.170 | 1.505  |
| July 2017-2018                    | 16                | 60             | 8                      | 45  | 9   | 120                                        | 1770             | 960              | 0.216     | 1.476  | -2.201 |
| Oct. 2017-2018, above ground      | 39                | 93             | 28                     | 93  | 62  | 741                                        | 4278             | 3627             | 1.309     | -1.321 | 1.019  |
| Oct. 2017-2018, contact with soil | 31                | 109            | 17                     | 140 | 43  | 465                                        | 5886             | 3379             | -1.413    | 2.172  | -2.144 |
| Dec. 2017-2018, above ground      | 42                | 110            | 22                     | 119 | 68  | 861                                        | 5995             | 4620             | -0.598    | -0.253 | 0.733  |
| Dec. 2017-2018, contact with soil | 35                | 116            | 19                     | 149 | 50  | 595                                        | 6670             | 4060             | -1.384    | 1.949  | -1.849 |
| Feb. 2017-2018, above ground      | 44                | 119            | 27                     | 136 | 72  | 946                                        | 7021             | 5236             | -0.207    | -0.081 | 0.244  |
| Feb. 2017-2018, contact with soil | 46                | 114            | 26                     | 135 | 91  | 1035                                       | 6441             | 5244             | -0.752    | -0.978 | 1.845  |

<sup>1</sup> according to sampling date, cropping season and contact with soil

<sup>2</sup> fungal species

<sup>3</sup> bacterial species

<sup>4</sup> estimated by  $C_2^{n_F} = \frac{n_F!}{2 \times (n_F - 2)!}$

<sup>5</sup> estimated by  $C_2^{n_B}$

<sup>6</sup> estimated by  $n_F \times n_B$

**Supplementary Table 3** - Number of ASVs detected for each analysis performed on the dataset and properties of residue microbial ecological networks

| Year      | Sampling date | Soil condition | All taxa |     |       | Number of taxa promoted in inoculated condition |    |       | Number of taxa promoted in non-inoculated condition |    |       | Number of taxa promoted in contact with the soil (SC) |    |       | Number of taxa promoted without contact with the soil (AG) |    |       | Network analysis |     |       |                  |               |                               |
|-----------|---------------|----------------|----------|-----|-------|-------------------------------------------------|----|-------|-----------------------------------------------------|----|-------|-------------------------------------------------------|----|-------|------------------------------------------------------------|----|-------|------------------|-----|-------|------------------|---------------|-------------------------------|
|           |               |                | F        | B   | Total | F                                               | B  | Total | F                                                   | B  | Total | F                                                     | B  | Total | F                                                          | B  | Total | F                | B   | Total | Interacting node | Isolated node | <i>Z. tritici</i> interaction |
| 2016-2017 | Jul.          | -              | 36       | /   | 8     | /                                               | 8  | 6     | /                                                   | 6  | -     | -                                                     | -  | -     | -                                                          | -  | 20    | /                | 20  | 12    | 8                | 2             |                               |
| 2016-2017 | Oct.          | AG             | 61       | 182 | 8     | 2                                               | 10 | 4     | 1                                                   | 5  | 13    | 31                                                    | 44 | 9     | 18                                                         | 27 | 32    | 73               | 105 | 79    | 26               | 4             |                               |
| 2016-2017 | Oct.          | SC             | 106      | 167 | 1     | 2                                               | 3  | 3     | 6                                                   | 9  |       |                                                       |    |       |                                                            |    | 52    | 90               | 142 | 133   | 9                | nd            |                               |
| 2016-2017 | Dec.          | AG             | 101      | 260 | 7     | 4                                               | 11 | 5     | 4                                                   | 9  | 13    | 36                                                    | 49 | 6     | 16                                                         | 22 | 39    | 100              | 139 | 121   | 18               | nd            |                               |
| 2016-2017 | Dec.          | SC             | 164      | 227 | 2     | 3                                               | 5  | 0     | 4                                                   | 4  |       |                                                       |    |       |                                                            |    | 51    | 105              | 156 | 150   | 6                | nd            |                               |
| 2016-2017 | Feb.          | AG             | 138      | 285 | 2     | 2                                               | 4  | 1     | 1                                                   | 2  | 13    | 37                                                    | 50 | 14    | 20                                                         | 34 | 48    | 107              | 155 | 145   | 10               | nd            |                               |
| 2016-2017 | Feb.          | SC             | 179      | 238 | 4     | 2                                               | 6  | 1     | 1                                                   | 2  |       |                                                       |    |       |                                                            |    | 55    | 110              | 165 | 158   | 7                | nd            |                               |
| 2017-2018 | Jul.          | -              | 36       | 286 | 2     | 7                                               | 9  | 6     | 3                                                   | 9  | -     | -                                                     | -  | -     | -                                                          | -  | 16    | 60               | 76  | 60    | 16               | 6             |                               |
| 2017-2018 | Oct.          | AG             | 87       | 197 | 5     | 6                                               | 11 | 7     | 3                                                   | 10 | 8     | 36                                                    | 44 | 5     | 20                                                         | 25 | 39    | 93               | 132 | 119   | 13               | 7             |                               |
| 2017-2018 | Oct.          | SC             | 117      | 216 | 4     | 6                                               | 10 | 5     | 2                                                   | 7  |       |                                                       |    |       |                                                            |    | 31    | 109              | 140 | 126   | 14               | 2             |                               |
| 2017-2018 | Dec.          | AG             | 104      | 252 | 5     | 13                                              | 18 | 4     | 9                                                   | 13 | 7     | 43                                                    | 50 | 6     | 22                                                         | 28 | 42    | 110              | 152 | 142   | 10               | nd            |                               |
| 2017-2018 | Dec.          | SC             | 158      | 230 | 1     | 4                                               | 5  | 5     | 2                                                   | 7  |       |                                                       |    |       |                                                            |    | 35    | 116              | 151 | 140   | 11               | nd            |                               |
| 2017-2018 | Feb.          | AG             | 135      | 340 | 6     | 8                                               | 14 | 2     | 6                                                   | 8  | 8     | 33                                                    | 41 | 10    | 21                                                         | 31 | 44    | 119              | 163 | 152   | 11               | nd            |                               |
| 2017-2018 | Feb.          | SC             | 193      | 253 | 0     | 4                                               | 4  | 3     | 4                                                   | 7  |       |                                                       |    |       |                                                            |    | 46    | 114              | 160 | 147   | 13               | nd            |                               |

## Supplementary Figure 1

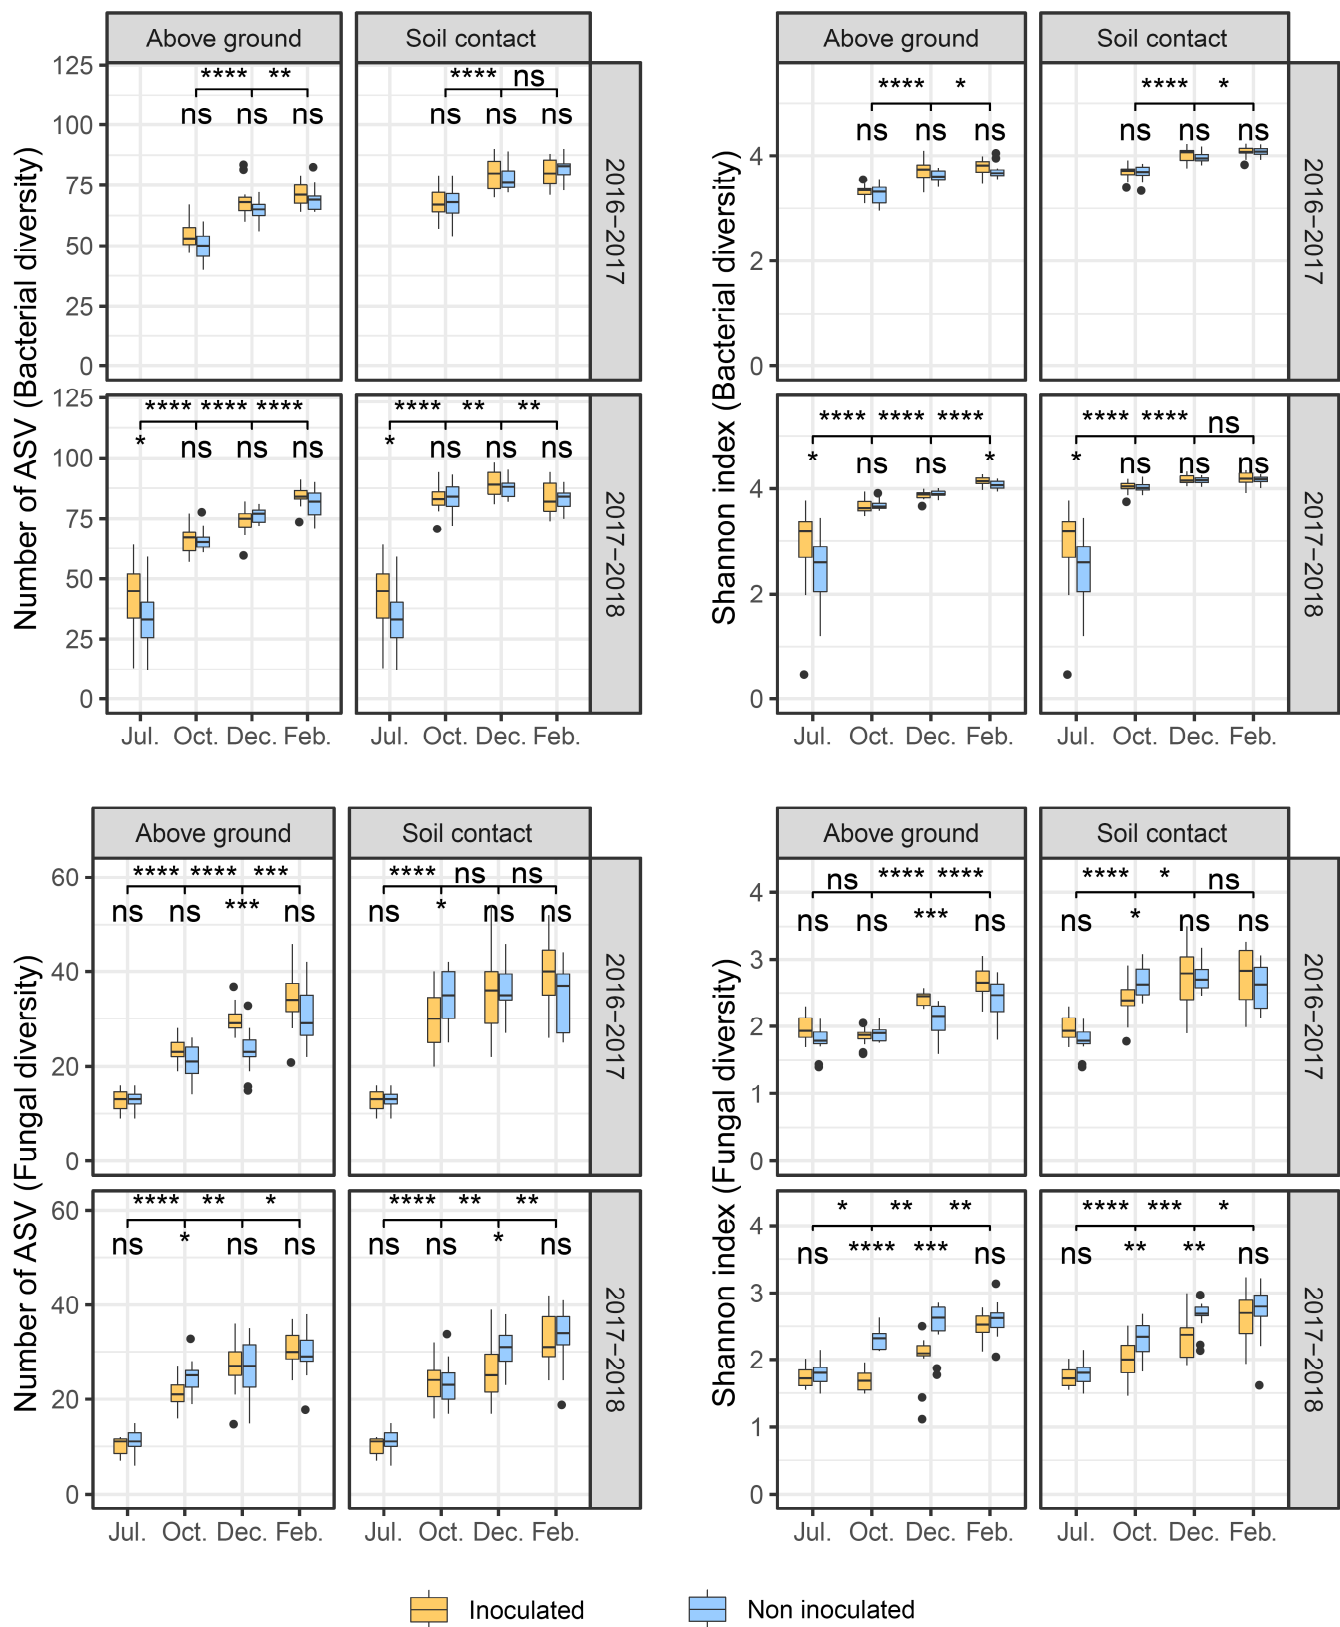

## Supplementary Figure 2

**A**

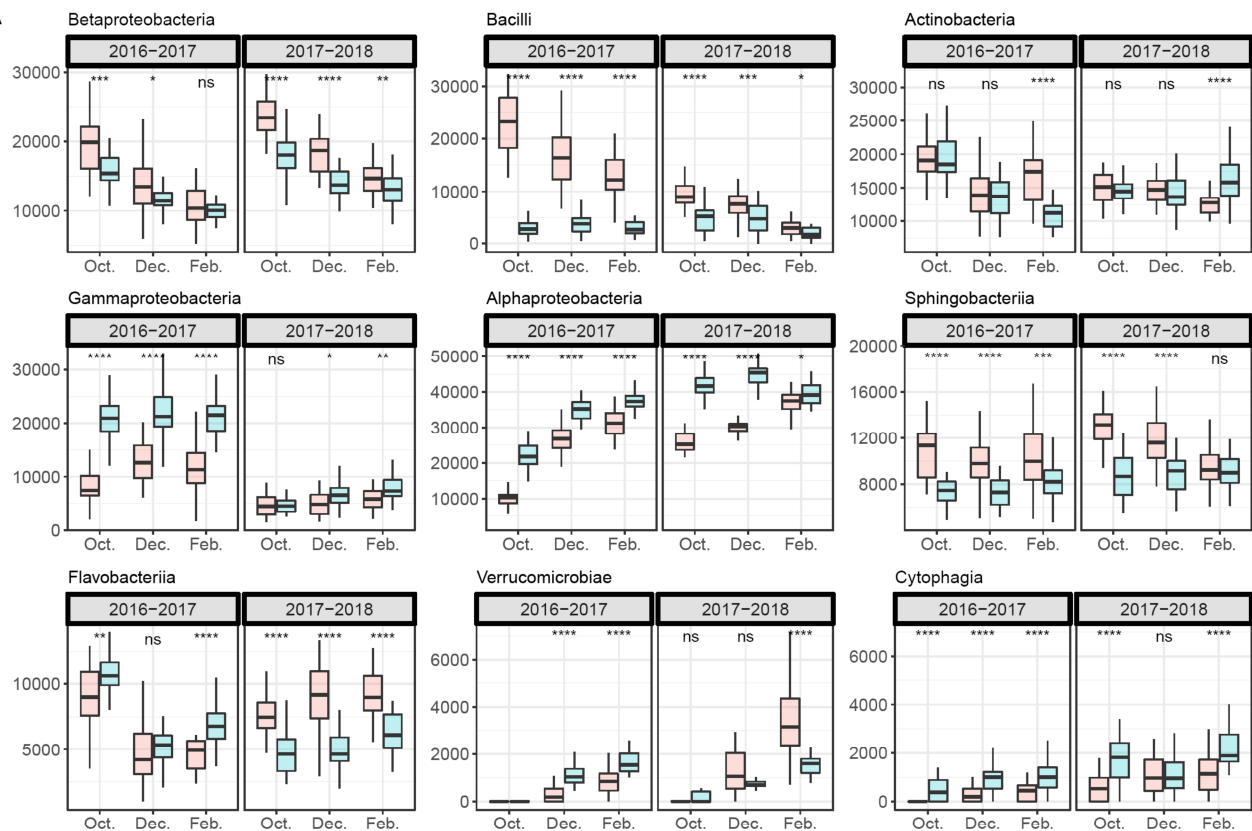

**B**

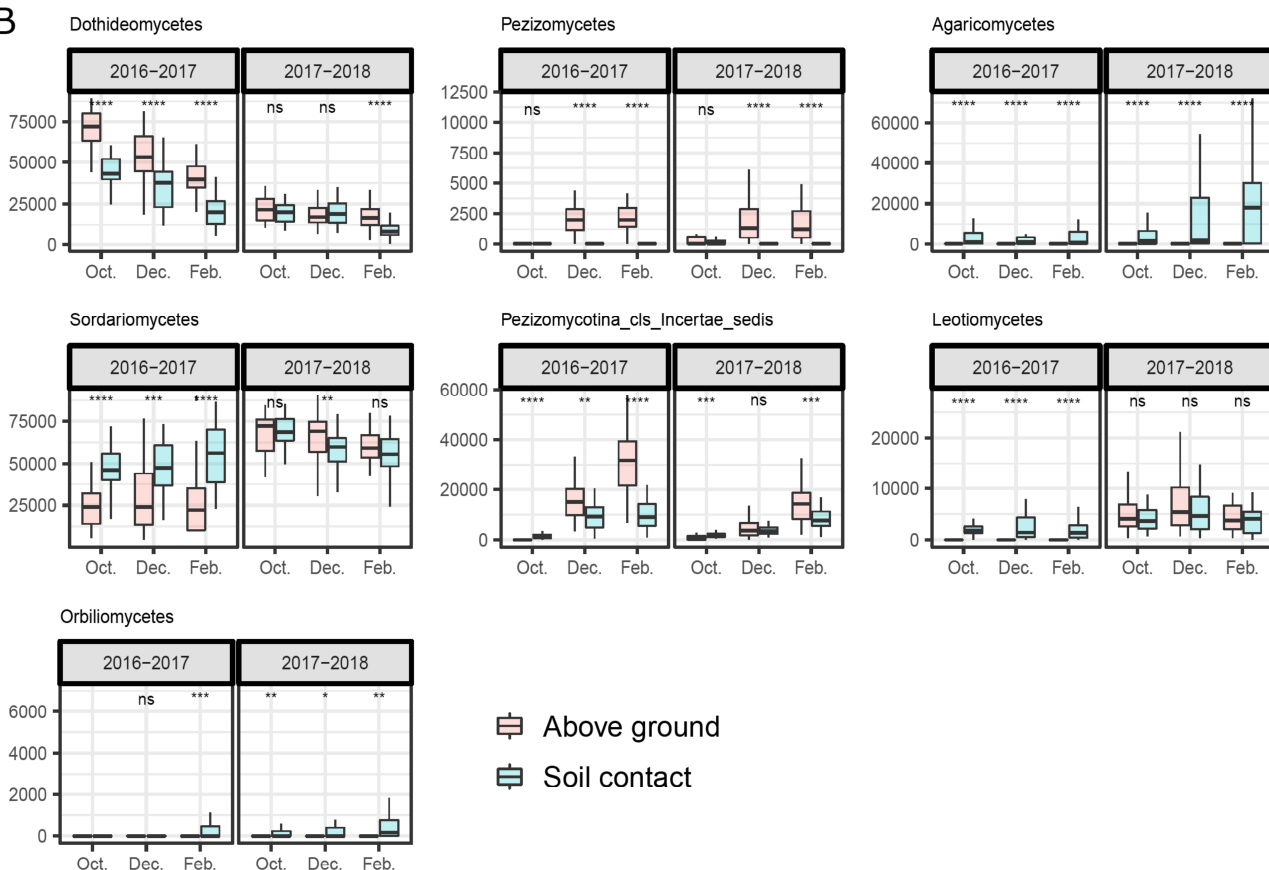

### Supplementary Figure 3

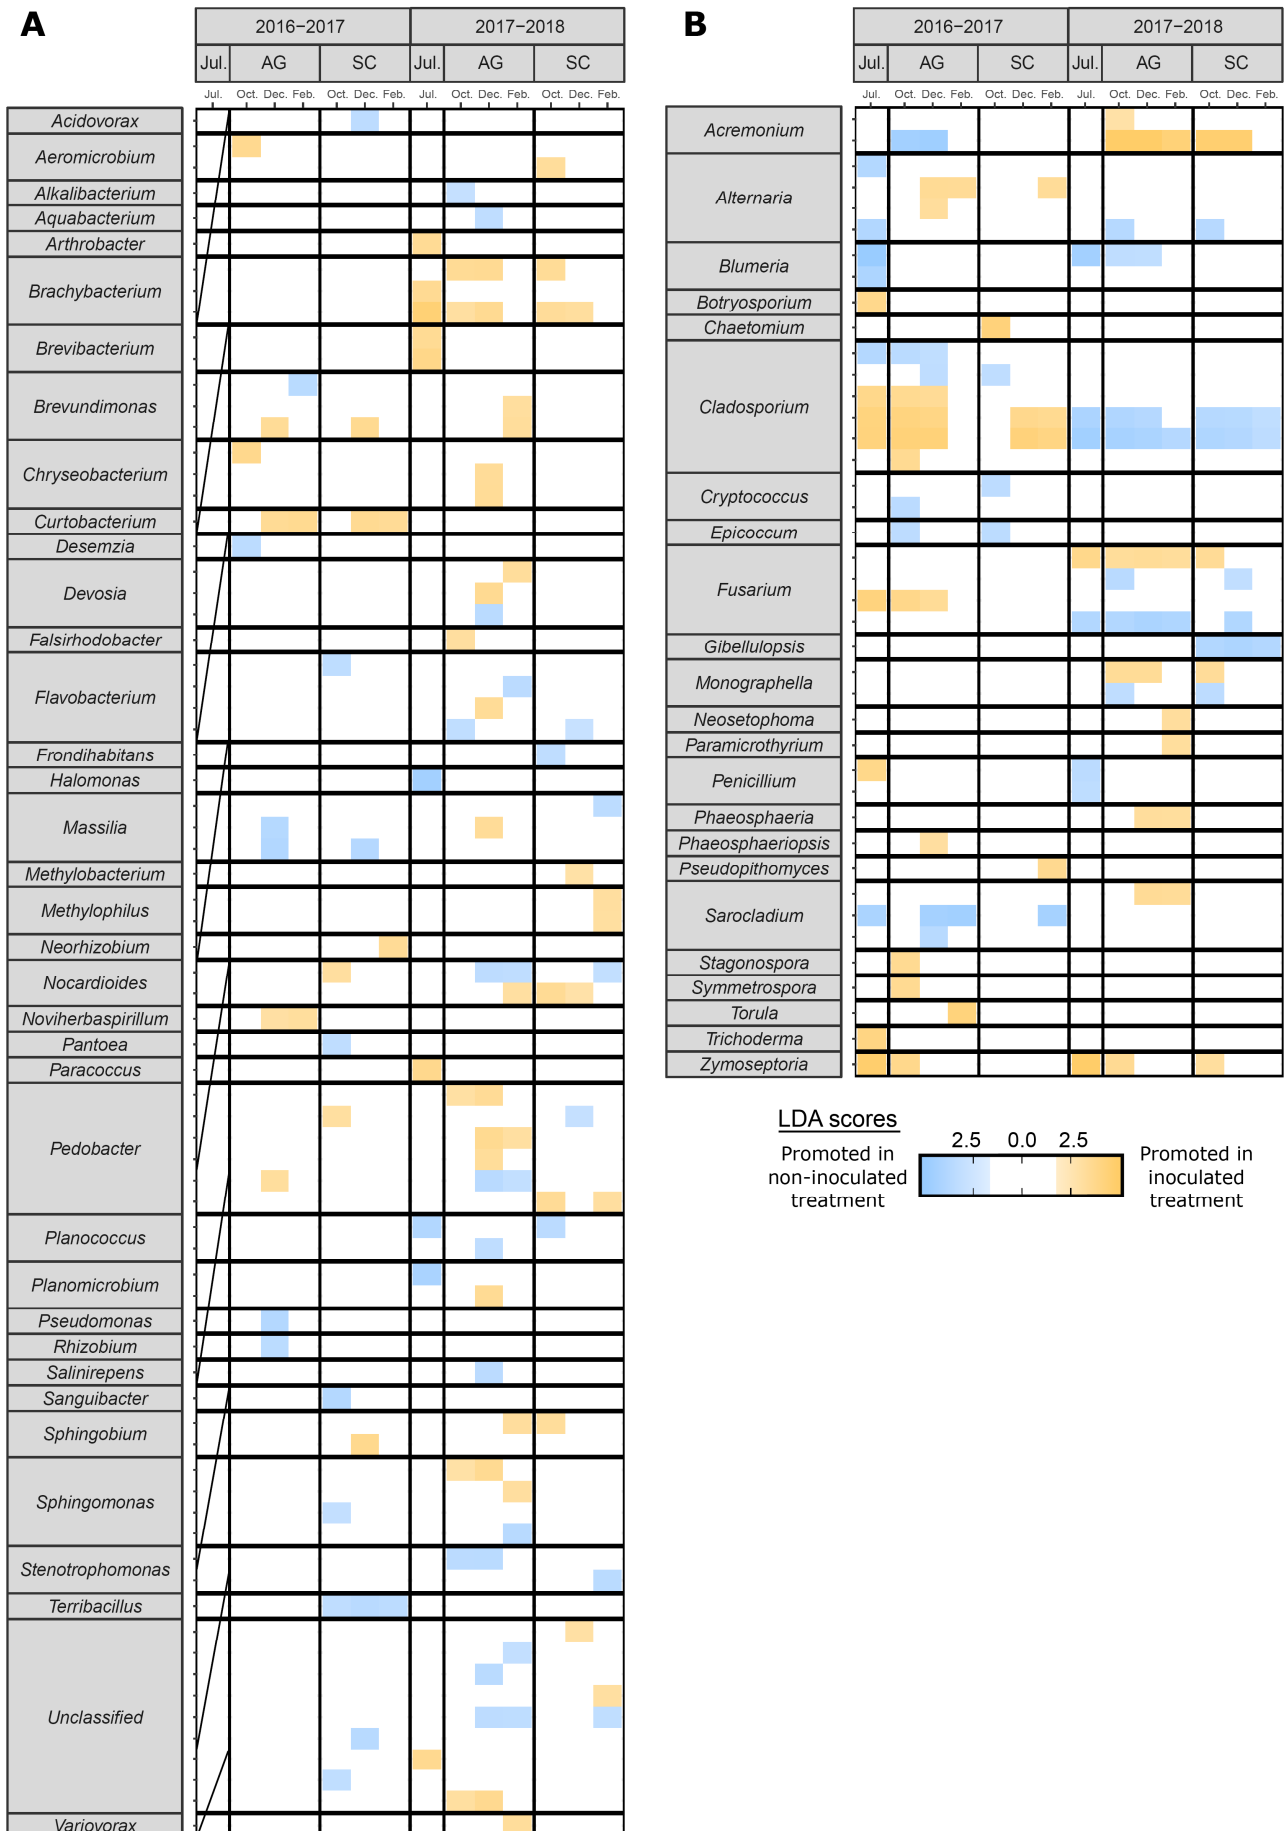



## Supplementary Figure 4

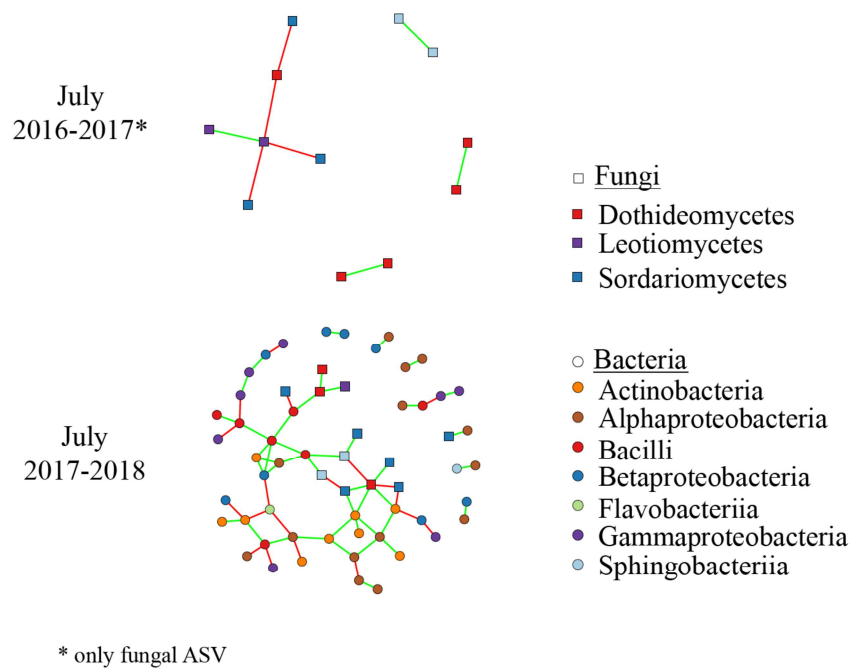

## Supplementary Figure 5

2016-2017

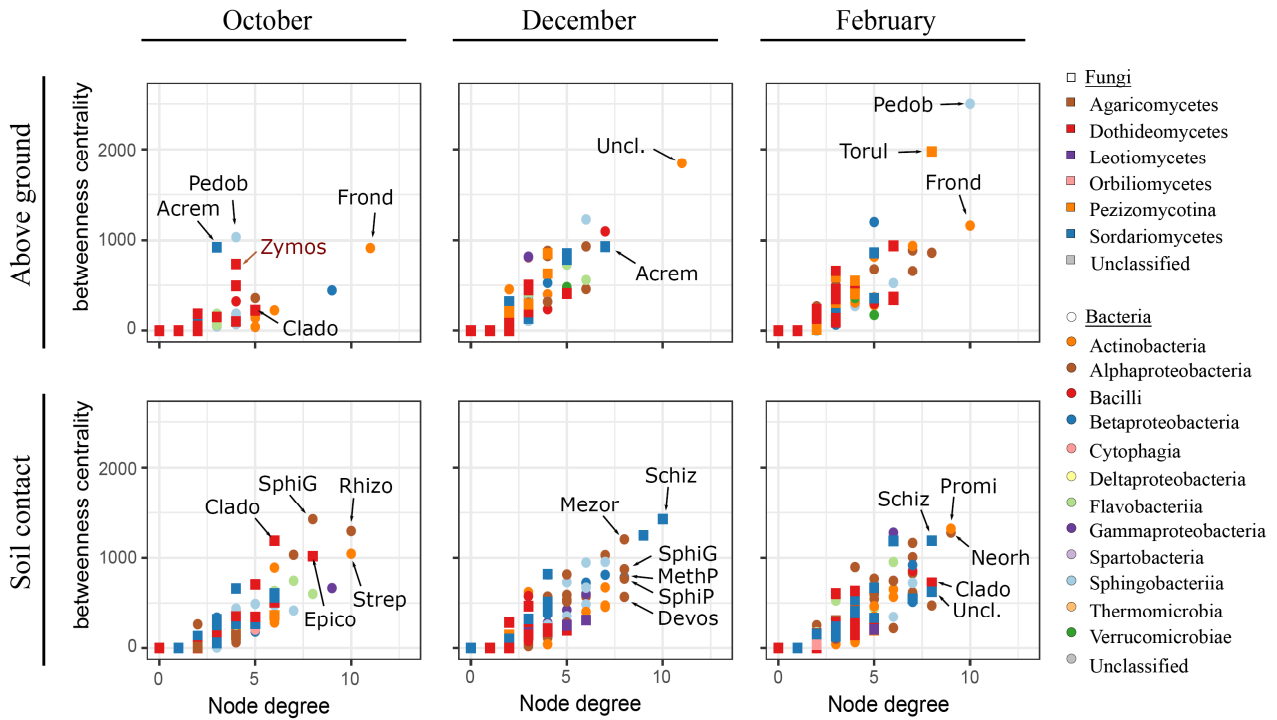

2017-2018

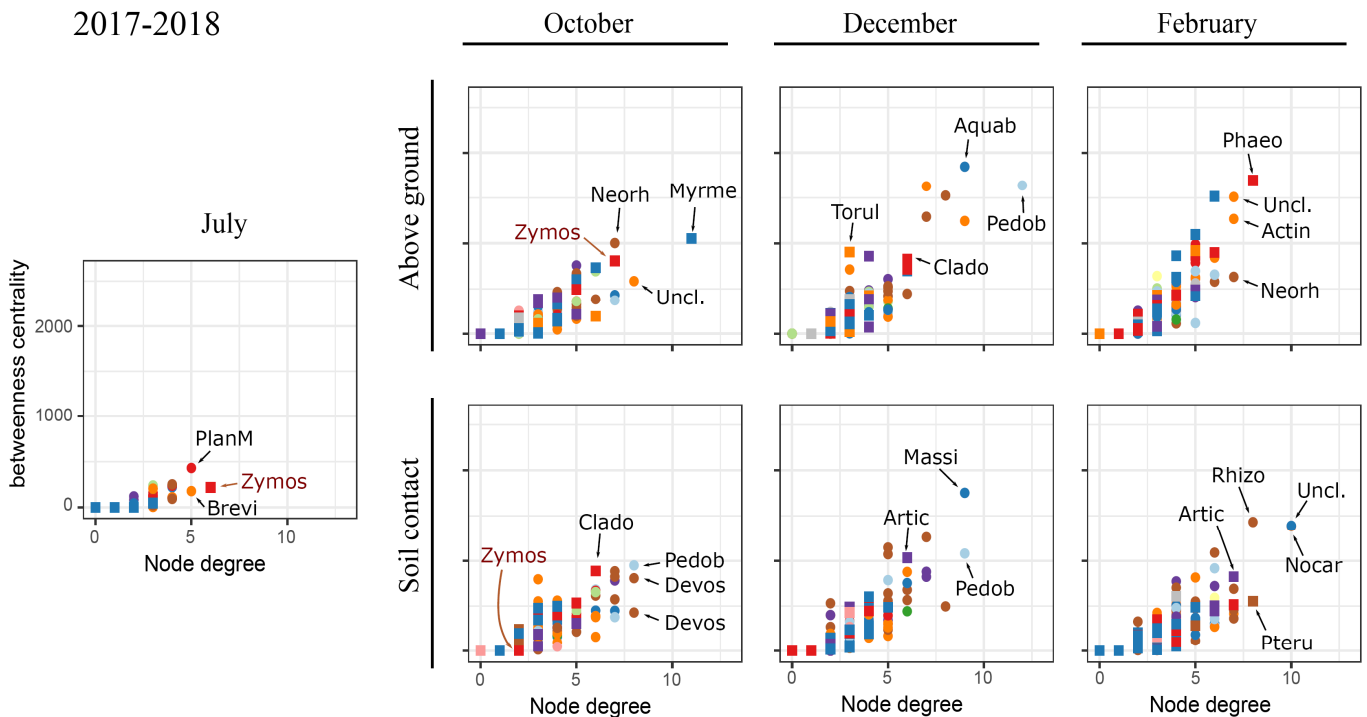

## Supplementary Figure 6

**A**

|                              |
|------------------------------|
| <i>Fusarium avenaceum</i>    |
| <i>Fusarium culmorum</i>     |
| <i>Fusarium langsethiae</i>  |
| <i>Fusarium moniliforme</i>  |
| <i>Fusarium sambucinum</i>   |
| <i>Fusarium subglutinans</i> |
| <i>Fusarium temperatum</i>   |
| <i>Fusarium tricinctum</i>   |
| <i>Plenodomus biglobosus</i> |
| <i>Microdochium bolleyi</i>  |
| <i>Zymoseptoria tritici</i>  |

**B**

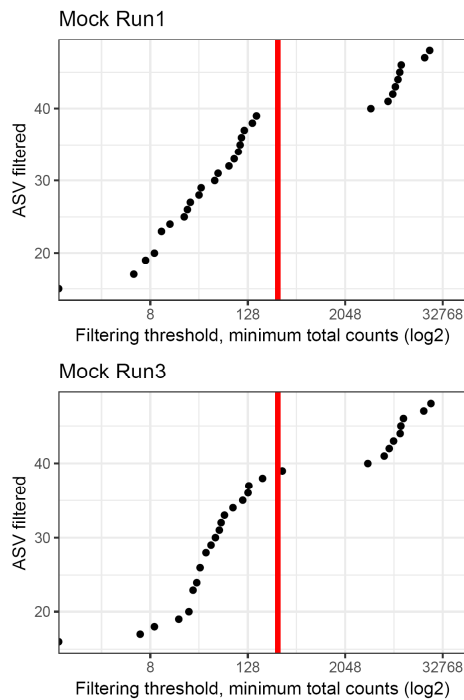

**C**

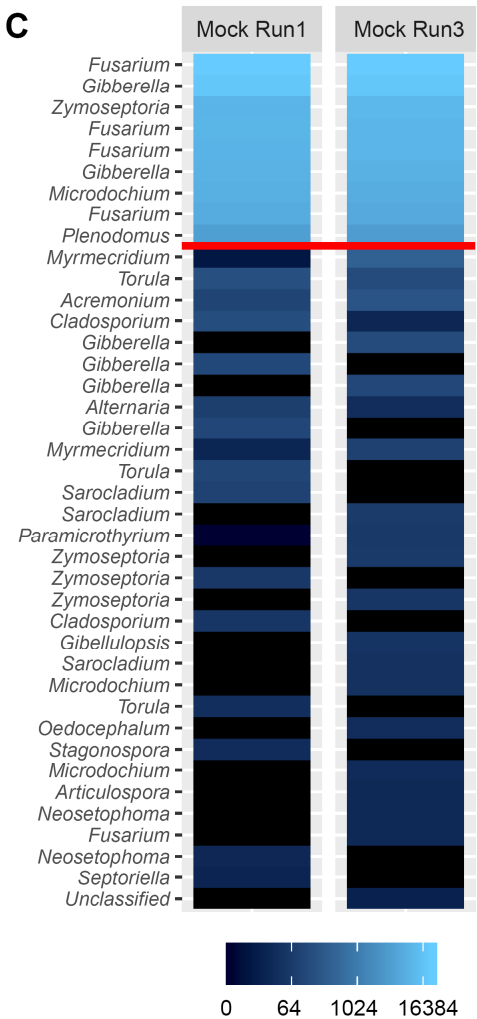

**D**

|                            |
|----------------------------|
| <i>Agrobacterium sp</i>    |
| <i>Brevibacillus sp</i>    |
| <i>Brevundimonas sp</i>    |
| <i>Erwinia sp</i>          |
| <i>Labeledella sp</i>      |
| <i>Morganella sp</i>       |
| <i>Paenibacillus sp</i>    |
| <i>Pantoea agglomerans</i> |
| <i>Pseudomonas sp</i>      |
| <i>Stenotrophomonas sp</i> |
| <i>Xanthomonas sp</i>      |

**E**

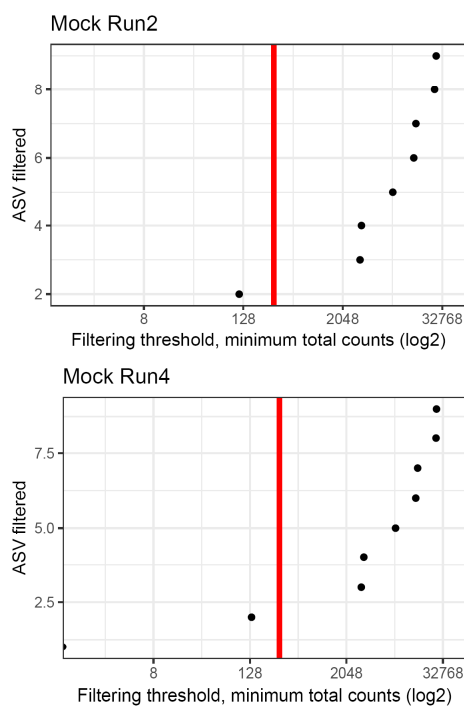

**F**

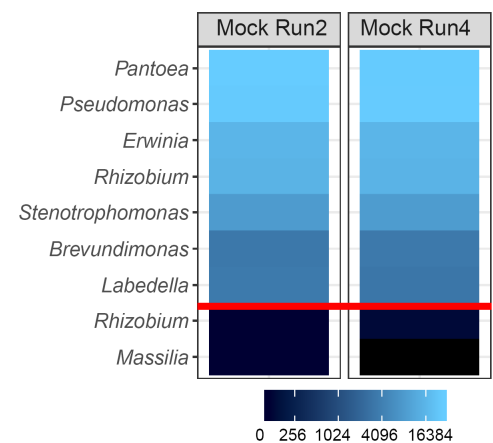

Source: http://biorxiv.org/content/10.1101/587667v1.full.pdf
